# Supplementary material for: Influence of videolaryngoscopy using McGrath Mac on the need for a helper to perform intubation during general anaesthesia: a multicentre randomised video-no-video trial
Source: PubMed Central journal article supplement — BMJ Open. 2022 Jan 3;12(1):e049275. doi: 10.1136/bmjopen-2021-049275 (PMC8724720; doi:10.1136/bmjopen-2021-049275), 2022-01-03
Supplement: bmjopen-2021-049275.draft_revisions.pdf [file bmjopen-2021-049275.draft_revisions.pdf]

# BMJ Open

BMJ Open is committed to open peer review. As part of this commitment we make the peer review history of every article we publish publicly available.

When an article is published we post the peer reviewers' comments and the authors' responses online. We also post the versions of the paper that were used during peer review. These are the versions that the peer review comments apply to.

The versions of the paper that follow are the versions that were submitted during the peer review process. They are not the versions of record or the final published versions. They should not be cited or distributed as the published version of this manuscript.

BMJ Open is an open access journal and the full, final, typeset and author-corrected version of record of the manuscript is available on our site with no access controls, subscription charges or pay-per-view fees (<http://bmjopen.bmj.com>).

If you have any questions on BMJ Open's open peer review process please email [info.bmjopen@bmj.com](mailto:info.bmjopen@bmj.com)

# BMJ Open

## Influence of videolaryngoscopy using McGrath Mac™ on the need for a helper to perform intubation during general anaesthesia: A multicentre randomised Video - No-Video trial

|                               |                                                                                                                                                                                                                                                                                                                                                                                                                                                                                                                                                                                                                                                                                                                                                                                                                                                                                                             |
|-------------------------------|-------------------------------------------------------------------------------------------------------------------------------------------------------------------------------------------------------------------------------------------------------------------------------------------------------------------------------------------------------------------------------------------------------------------------------------------------------------------------------------------------------------------------------------------------------------------------------------------------------------------------------------------------------------------------------------------------------------------------------------------------------------------------------------------------------------------------------------------------------------------------------------------------------------|
| Journal:                      | <i>BMJ Open</i>                                                                                                                                                                                                                                                                                                                                                                                                                                                                                                                                                                                                                                                                                                                                                                                                                                                                                             |
| Manuscript ID                 | bmjopen-2021-049275                                                                                                                                                                                                                                                                                                                                                                                                                                                                                                                                                                                                                                                                                                                                                                                                                                                                                         |
| Article Type:                 | Original research                                                                                                                                                                                                                                                                                                                                                                                                                                                                                                                                                                                                                                                                                                                                                                                                                                                                                           |
| Date Submitted by the Author: | 20-Jan-2021                                                                                                                                                                                                                                                                                                                                                                                                                                                                                                                                                                                                                                                                                                                                                                                                                                                                                                 |
| Complete List of Authors:     | <p>Belze, Olivier; Groupe Clinique Ambroise Paré, Department of Anesthesiology<br/> Coppere, Zoé; Fondation Ophtalmologique Adolphe de Rothschild, Department of Anaesthesiology<br/> Ouattara, Jonathan; Paris Saint Joseph Hospital Group, Department of Anaesthesia<br/> Thion, Laurie-Anne ; Fondation Ophtalmologique Adolphe de Rothschild, Department of Anaesthesia and Intensive Care<br/> Paqueron, Xavier; Centre Clinical de Soyaux, Department of Anaesthesiology and Intensive Care<br/> Devys, Jean-Michel; Service d'Anesthésie-Réanimation, Fondation Ophtalmologique Adolphe de Rothschild 25, rue Manin, F-75019 Paris, France<br/> Ma, Sabrina; Hopital Foch, Department of Anesthesiology<br/> Kennel, Titouan; Hopital Foch, Department of Research and Innovation<br/> Fischler, Marc; Hopital Foch, Anesthesia<br/> Le Guen, Morgan; Hopital Foch, Department of Anesthesiology</p> |
| Keywords:                     | Adult anaesthesia < ANAESTHETICS, Adult intensive & critical care < ANAESTHETICS, Adult surgery < SURGERY                                                                                                                                                                                                                                                                                                                                                                                                                                                                                                                                                                                                                                                                                                                                                                                                   |
|                               |                                                                                                                                                                                                                                                                                                                                                                                                                                                                                                                                                                                                                                                                                                                                                                                                                                                                                                             |

SCHOLARONE™  
Manuscripts

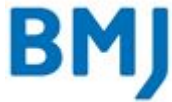

I, the Submitting Author has the right to grant and does grant on behalf of all authors of the Work (as defined in the below author licence), an exclusive licence and/or a non-exclusive licence for contributions from authors who are: i) UK Crown employees; ii) where BMJ has agreed a CC-BY licence shall apply, and/or iii) in accordance with the terms applicable for US Federal Government officers or employees acting as part of their official duties; on a worldwide, perpetual, irrevocable, royalty-free basis to BMJ Publishing Group Ltd ("BMJ") its licensees and where the relevant Journal is co-owned by BMJ to the co-owners of the Journal, to publish the Work in this journal and any other BMJ products and to exploit all rights, as set out in our [licence](#).

The Submitting Author accepts and understands that any supply made under these terms is made by BMJ to the Submitting Author unless you are acting as an employee on behalf of your employer or a postgraduate student of an affiliated institution which is paying any applicable article publishing charge ("APC") for Open Access articles. Where the Submitting Author wishes to make the Work available on an Open Access basis (and intends to pay the relevant APC), the terms of reuse of such Open Access shall be governed by a Creative Commons licence – details of these licences and which [Creative Commons](#) licence will apply to this Work are set out in our licence referred to above.

Other than as permitted in any relevant BMJ Author's Self Archiving Policies, I confirm this Work has not been accepted for publication elsewhere, is not being considered for publication elsewhere and does not duplicate material already published. I confirm all authors consent to publication of this Work and authorise the granting of this licence.

1  
2  
3 **Influence of videolaryngoscopy using McGrath Mac™ on the need for a helper to perform**  
4  
5 **intubation during general anaesthesia:**  
6  
7

8 **A multicentre randomised Video - No-Video trial**  
9

10 Running Title: Randomised Videolaryngoscopy trial for patients with normal airways  
11  
12  
13

14 Olivier Belze<sup>1</sup>, Zoe Coppere<sup>2</sup>, Jonathan Ouattara<sup>3</sup>, Laurie-Anne Thion<sup>2</sup>, Xavier Paqueron<sup>4</sup>,

15 Jean-Michel Devys<sup>2</sup>, Sabrina Ma<sup>1</sup>, Titouan Kennel<sup>5</sup>, Marc Fischler<sup>1</sup>,

16  
17  
18  
19 and Morgan Le Guen<sup>1</sup>  
20  
21  
22  
23

24 <sup>1</sup> Hôpital Foch, Department of Anaesthesia, Suresnes, France and Centre Médico-Chirurgical Ambroise  
25 Paré, Department of Anaesthesia, Neuilly-sur-Seine, France

26  
27  
28 <sup>2</sup> Fondation Adolphe de Rothschild, Department of Anaesthesia and Intensive Care, Paris, France

29  
30  
31 <sup>3</sup> Hôpital Saint-Joseph, Department of Anaesthesia, Paris, France

32  
33 <sup>4</sup> Centre Clinical, Department of Anaesthesia and Intensive Care, Soyaux, France

34  
35 <sup>5</sup> Hôpital Foch, Department of Research and Innovation, Suresnes, France  
36  
37  
38  
39

40 Corresponding author: Marc Fischler, MD, Department of Anaesthesia, Hospital Foch, 40 rue Worth,  
41 Suresnes, France. Email: m.fischler@hopital-foch.com; Phone: +33 1 46 25 24 42 (Business telephone)  
42 - +33 6 09 68 78 54 (Mobile); Fax: +33 1 46 25 20 88  
43  
44  
45  
46  
47  
48  
49  
50  
51  
52  
53  
54  
55  
56  
57  
58  
59  
60

## Abstract

**Objective:** We hypothesized that use of a videolaryngoscope modifies the practice of tracheal intubation.

**Design:** Randomized single-blinded study.

**Setting:** Three institutions: one academic, one non-profit and one profit.

**Participants:** Inclusion criteria were patients aged 18 years minimum, requiring orotracheal intubation, without a predicted difficult intubation (Arne score <11). Non-inclusion criteria were patients requiring a rapid-sequence intubation. 300 patients were included, 271 randomised, 256 analysed: 123 in the No-Video group and 133 in the Video group.

**Intervention:** Tracheal intubation uses a McGrath Mac™ videolaryngoscope. Patients were randomised into two groups: a Video group (screen activated) and a No-Video group (screen hidden).

**Primary and secondary outcome measures:** The main outcome was the need for help for the anaesthesiologist or the nurse anaesthetist in performing tracheal intubation, the sequence being video recorded. Secondary outcomes included the ease of intubation (intubation difficulty scale, Cormack and Lehane grade, percentage of glottic opening score, use of alternative techniques, duration, oxygen desaturation, especially). Other outcomes included the cooperation between members of the anaesthesiology team, the proportion of patients suffering from postoperative hoarseness or sore throat, and other adverse events.

**Results:** Requirement for assistance was not decreased in the Video group: 36.1% [95% CI 27.9 to 44.9] versus 45.5% [95% 36.5 to 54.7] in the No-Video group ( $p=0.124$ ). Intubation difficulty scale was lower in the Video group ( $p=0.009$ ); glottis visualization (Cormack and Lehane score and glottic opening score) was better in the Video group ( $p<0.001$ ). Duration of intubation was similar between groups. Oxygen desaturation or hypotension requiring treatment during the intubation period and postoperative complications (hoarseness or sore throat) were observed similarly in both groups. No other adverse event occurred.

1  
2  
3 **Conclusion:** In patients without risk of difficulty in airway management, videolaryngoscopy did not  
4  
5 decrease the requirement for assistance to perform intubation.  
6

7 **Trial registration:** Clinicaltrials.gov identifier: NCT02926144  
8  
9  
10  
11  
12  
13  
14  
15  
16  
17  
18  
19  
20  
21  
22  
23  
24  
25  
26  
27  
28  
29  
30  
31  
32  
33  
34  
35  
36  
37  
38  
39  
40  
41  
42  
43  
44  
45  
46  
47  
48  
49  
50  
51  
52  
53  
54  
55  
56  
57  
58  
59  
60

For peer review only

### Strengths and limitations of this study

- This study aimed to assess if the use of a videolaryngoscope modifies the practice of tracheal intubation in real life conditions.
- A major strength of this study performed on patients without a predicted difficult intubation was the choice of the main outcome: the need for help for the anaesthesiologist or the nurse anaesthetist in performing tracheal intubation.
- Permanent presence of a two-person team may have induced a bias because it facilitates the practice of an alternative technique.
- Another weakness comes from the choice of the McGrath MAC videolaryngoscope and, consequently, results cannot be generalized to other videolaryngoscopes which differ by the shape of the blade, and the existence or not of a channel.

## Introduction

Airway management remains a major concern for anaesthesiologists while related morbimortality is determinant for anaesthesia.<sup>1-3</sup> Securing the patient's airway is a critical step in providing general anaesthesia and several recommendations have been published regarding the practice of intubation in anaesthesia.<sup>4,5</sup> Direct laryngoscopy using the original Macintosh laryngoscope has been the rule for the past half century; however a wide range of videolaryngoscopes has been developed in recent years to provide an indirect visualization of the glottis via a camera. In patients with a suspected difficult airway, there is no doubt that videolaryngoscopy is associated with a significantly better view of the glottis, increases the first-attempt success and reduces mucosal trauma.<sup>6</sup>

In patients with no predicted difficult airway, no difference in failed intubation has been reported when comparing a videolaryngoscope and Macintosh laryngoscope.<sup>7</sup> Nevertheless some authors consider that the use of videolaryngoscopes is obvious for all patients, even for those in whom preoperative assessment has not found evidence of a particular risk of access to the airways.<sup>8-10</sup>

In their analysis of the literature, Lewis *et al.*<sup>7</sup> emphasize the importance of the choice of the evaluation criteria used to compare the techniques: glottic view, time required for intubation, successful intubation particularly at the first-attempt, risks of complications like hypoxia or other respiratory complications, laryngeal or airway traumas, and sore throat in the post-anaesthesia care unit. Another question that needs to be asked when a new technology is proposed is: does this technology change the practice?

This randomised multicentre study realized in real-life conditions, presence of an anaesthesiologist and of a nurse anaesthetist during the induction-intubation period, compared two scenarios, both using the same videolaryngoscope, one using the video function and the other not, for orotracheal intubation of surgical patients without particular risk of access to the airways. The hypothesis was that the use of the videolaryngoscope modifies the practice of tracheal intubation, the main outcome being the need for help for the anaesthesiologist or the nurse anaesthetist in performing tracheal intubation.



## Methods

### *Study Design, Ethics approval and Setting*

The McGrath Mac Videolaryngoscope versus McGrath Mac No-Video Laryngoscope for Orotracheal Intubation in Operating Room (Video - No-Video study) trial was an institutionally sponsored, single-blinded, multicentre, two parallel-groups randomised clinical trial (RCT) conducted at three Health Institutions in France (one academic, one non-profit and one profit). After approval by the Ethics Committee (Comité de Protection des Personnes Ile de France VIII, Boulogne Billancourt, France, n°160108, 19 February 2016, Chairman Bertrand MUSSETTA) and by the French Regulatory Office, and after registration on the web site ClinicalTrials.gov (NCT02926144, first Posted on October 6, 2016), patients were enrolled in the study after they gave their written informed consent including videorecording and blurring of patients faces if necessary.

Patient and public were not involved in the design, or conduct, or reporting, or dissemination plans of the research.

### *Patient population*

Inclusion criteria were patients aged 18 years minimum, requiring general anaesthesia and oro-tracheal intubation with a single lumen tube, without a predicted difficult intubation (Arne score <11).<sup>11</sup>

Non-inclusion criteria were currently pregnant or breastfeeding woman, out-patients who could not be contacted within 24 hours following surgery, patients requiring a rapid-sequence intubation, and patients for whom general anaesthesia using sufentanil, propofol, atracurium or rocuronium was not suitable.

Inclusion and exclusion criteria were assessed by an investigator who could be different from the one who was to perform the intubation. Once in the operating room, inclusion criteria were confirmed by the anaesthesiologist in charge and randomisation was managed online.

### *Randomisation, Allocation Concealment*

Centralized randomisation using fixed-size blocks had been performed by an independent biostatistician not involved in the trial. The randomisation scheme was balanced 1:1 and stratified by centre. Each patient received a unique patient number and a randomisation number (patient code) when the investigator connected to an Interactive Web Response System managed by an independent Contract Research Organization (Epiconcept Company, 75012, Paris, France) using a protected password just before the induction of anaesthesia. Thus, patients were randomised into two groups: a Video group, in which intubation is performed using a McGrath Mac videolaryngoscope with its screen activated, and a No-Video group, in which intubation is performed using a McGrath Mac videolaryngoscope with its screen hidden. The software used to allocate the patients to their group also was in-live fulfilled to collect data by the investigator in an electronic report form, ensuring concealment.

### *Study Protocol*

Patients received care during the induction and intubation periods from an anaesthesiologist and a nurse anaesthetist as is usual in the hospitals where the protocol takes place. All anaesthesiologists and nurse anaesthetists working at the participating hospitals were experienced in orotracheal intubations using the McGrath Mac or had performed at least ten intubations with the device for training. They received a specific training pertaining to the study procedures prior to the beginning of the trial including the fact that they must rely on the video screen in the Video group and use the direct view in the No-Video group.

Upon arrival in the operating room, a dedicated peripheral intravenous cannula for the administration of IV anaesthetics was placed on the forearm, and routine monitoring was performed including bispectral index monitoring and quantitative measurement of neuromuscular block at the adductor

1  
2  
3 pollicis. Patients were positioned in dorsal decubitus with the head on a 7cm high pillow.  
4  
5 Preoxygenation was achieved using a face mask, and oxygen at a flow of 15 L/min or greater for at  
6  
7 least 3 minutes to achieve an end-tidal oxygen fraction of at least 90%.  
8

9  
10 General anaesthesia was then induced by injecting sufentanil, propofol and a neuromuscular blocking  
11  
12 agent (atracurium or rocuronium) once the patient was unconsciousness. Laryngoscopy was  
13  
14 performed by the anaesthesiologist or the nurse anaesthetist using the device allocated at random  
15  
16 when bispectral index was under 60 and when there was no more muscle response to the train of four  
17  
18 stimulation.  
19

20  
21 Intubation was performed using the video screen of the device in the McGrath Mac Videolaryngoscope  
22  
23 group (Video group) while the video screen was hidden with an opaque cover in the McGrath Mac No-  
24  
25 Video Laryngoscope group (No-Video group). Endotracheal tube size was 7 for women and 7.5 for men  
26  
27 with blades size 3 or 4 according the practitioner's preference.  
28

29  
30 Asking for help from the other member of the anaesthetic team was at the discretion of the individual  
31  
32 performing intubation if he/she deemed it necessary to perform an atraumatic intubation.  
33

34 Complementary techniques consisted in (a) backward, upward and rightward pressure (BURP)  
35  
36 manoeuvre; (b) rail-roading the tube over a gum elastic bougie; (c) removing the opaque cover on the  
37  
38 video screen in the No-Video group or change in the operator. If all these techniques failed, other  
39  
40 manoeuvres could be used: (a) insertion of a stylet into the tube; (b) changing the blade; (c) removal  
41  
42 of the pillow. Rescue techniques (insertion of an Intubating Laryngeal Mask Airway, transtracheal  
43  
44 oxygenation, fiberoptic intubation, awakening) were considered if necessary according to the national  
45  
46 recommendations.<sup>12</sup>  
47  
48

49  
50 After intubation, the cuff was inflated, the tube was connected to the ventilator, and intratracheal  
51  
52 tube position was confirmed by analysing the capnography curve.  
53

54 Anaesthesia was conducted according to good practices.

55  
56 Patients were reviewed the following day. Sore throat and hoarseness were evaluated, and adverse  
57  
58 events collected by investigators not knowing the group to which the patient has been assigned.  
59  
60

### *Data collection*

All cases were video recorded by a person not involved in the study which followed a mandatory script.

This person, placed at the feet of the patient, was unable to see whether the screen of the videolaryngoscope was activated. Video recording began with preoxygenation and ended with the capnographic confirmation of successful tracheal intubation.

The framing of the videos was done in such a way that the patient's anonymity was respected.

Otherwise, the patient's face was blurred before analysis.

Analysis of each video was performed by two anaesthesiologists blinded to the study group since the screen, transparent or opaque, of the videolaryngoscope was not apparent. The videos were reviewed by both anaesthesiologists in case of discordance.

All the variables used for the study were retrieved from the video apart from the glottis exposure which was recorded in real time by the person who performed the intubation using the Cormack and Lehane modified score and the percentage of glottis opening scale (POGO) score.<sup>13, 14</sup>

### *Primary and secondary outcomes*

The primary outcome was the proportion of orotracheal intubations where assistance is necessary upon request of the operator.

Secondary outcomes included during the intubation period (1) the intubation difficulty scale,<sup>15</sup> (2) the Cormack and Lehane grade of glottis visibility, (3) the percentage of glottic opening scale score (POGO) score,<sup>14</sup> (4) the proportion of patients intubated using alternative techniques: (backward, upward and rightward pressure (BURP), rail-roading the tube over a gum elastic bougie, insertion of a stylet in the tube, laryngeal mask airway, fiberoptic endoscopy, or rescue percutaneous or surgical transtracheal oxygenation ...), anaesthesia discontinuation, (5) the time from introduction of the McGrath videolaryngoscope in the mouth to the confirmation of tracheal tube position based on partial pressure of end-tidal exhaled carbon dioxide (third capnogram), (6) the proportion of patients having

1  
2  
3 had an oesophageal intubation, (7), the ease of intubation evaluated by the anaesthesiologist using a  
4  
5 11-level numeric scale from 0 (very easy) to 10 (very difficult), (8) the requirement of an abnormal  
6  
7 traction force to intubate, (9) the heart rate and mean arterial pressure measured just before and after  
8  
9 intubation, (10) complications such as oxygen desaturation (peripheral oxygen saturation < 92%) or  
10  
11 hypotension having required treatment. The cooperation between members of the anaesthesiology  
12  
13 team during intubation was graded using a 4-point scale (0=no cooperation at all, 3=a great deal of  
14  
15 cooperation).<sup>16</sup>

16  
17  
18 The postoperative secondary outcomes included the proportion of patient suffering from hoarseness<sup>17</sup>  
19  
20 or sore throat<sup>18</sup> on postoperative day 1. Other adverse events will be also collected.  
21  
22  
23

#### 24 25 *Sample Size calculation*

26  
27 Adnet *et al.* published in 2001 a survey of tracheal intubation difficulty among 1171 surgical patients  
28  
29 and found that the Intubation Difficulty Scale was > 0 in 522 cases (45%) and that external laryngeal  
30  
31 pressure, requiring an assistant to help, was used in 271 of these cases (23% of all patients).<sup>19</sup> Based  
32  
33 on this previous data, the expected rate of the assistance of another person for intubation was 25 %  
34  
35 for patients in the No-Video group. Presuming that the video function would decrease this proportion  
36  
37 to 12.5 %, with type 1 error set at 5 % and power set at 80 %, 131 patients were needed in each group  
38  
39 (i.e., 262 patients total). It is was planned to recruit 300 patients to mitigate an attrition of the sample  
40  
41 or the absence of values.  
42  
43  
44  
45  
46  
47

#### 48 *Statistical Analyses*

49  
50 Results are presented as number (proportion) [Confidence Interval 95 of the percentage] for  
51  
52 categorical variables and compared by the Chi-square test when the number of observations was  
53  
54 greater than five, and by the exact Fischer test when one of the numbers was less than five. For  
55  
56 continuous variables, results are presented as median (Interquartile Range) [Confidence Interval 95 of  
57  
58  
59  
60

1  
2  
3 the median] and compared by a Wilcoxon test, after verification of the normality with a Shapiro-Wilk  
4  
5 test. All tests were two-sided.

6  
7 P values of less than 0.05 were considered significant. The statistics were generated using SAS 9.4  
8  
9 software.

10  
11 Dataset is available from the Dryad repository (DOI: 10.5061/dryad.280gb5mp6).  
12  
13  
14  
15  
16  
17  
18  
19  
20  
21  
22  
23  
24  
25  
26  
27  
28  
29  
30  
31  
32  
33  
34  
35  
36  
37  
38  
39  
40  
41  
42  
43  
44  
45  
46  
47  
48  
49  
50  
51  
52  
53  
54  
55  
56  
57  
58  
59  
60

For peer review only

## Results

Patients were recruited between the 29<sup>th</sup> November 2016 and the 1<sup>st</sup> April 2019. Of 300 included patients, 271 were randomised and 256 analysed with 123 patients in the No-Video group and 133 in the Video group (**Figure 1**).

Baseline features were well balanced between groups (**Table 1**).

The requirement for assistance was not statistically significantly decreased in the Video group: 36.1% versus 45.5% in the No-Video group ( $p=0.124$ ). The difference between groups was also similar when considering each centre separately;  $p=0.22$  for centre 1,  $p=0.41$  for centre 2, and  $p=0.62$  for centre 3.

The Intubation Difficulty Scale was lower in the Video group ( $p=0.009$ ) (**Table 2**).

Glottis visualization was significantly better in the Video group with a lower Cormack and Lehane score ( $p<0.001$ ), and higher percentage of glottic opening score ( $p<0.001$ ). There was no difference between groups considering other outcomes, in particular for duration of intubation, number of attempts, use of complementary techniques (BURP and railroading), except for ease of intubation, better in the Video group ( $p=0.001$ ), and for requirement of an abnormal traction force, lower in the Video group ( $p=0.007$ ) (**Table 2**). The opaque cover was withdrawn in 7.3% of the cases in the No-Video group.

Bispectral index increased after intubation only in the Video group ( $p=0.04$ ). Heart rate and mean arterial pressure increased in both groups after intubation with a smaller increase in mean arterial pressure in the Video group ( $p=0.04$ ) (**Table 3**).

Communication and behaviour within the anaesthesia team was appropriate in all cases (values of 3). Oxygen desaturation, hypotension or hypertension requiring treatment during the intubation period and postoperative complications (hoarseness or sore throat) were observed similarly in both groups (**Table 4**).

No other adverse event occurred.

## Discussion

In this Video-No Video trial performed in surgical patients without particular risk of difficulty in airway management, videolaryngoscopy did not decrease the requirement for assistance to perform intubation.

This result corroborates studies which consider that the use of a videolaryngoscope is of little interest in the management of such patients. Advantages of videolaryngoscopy seem to be secondary, especially better glottic visualization<sup>7</sup> which does not translate directly into a higher success rate on the first attempt.<sup>7, 20</sup>

There is no universal rule regarding anaesthetic staffing neither for qualifications, anaesthesiologists, or registered nurse anaesthetists nor for the required number during the whole procedure or during the induction-intubation sequence. In our study, patients received care during the induction and intubation periods from an anaesthesiologist and a nurse anaesthetist as is usual in the hospitals where the protocol takes place. This probably explains the high percentage of recourse to a second person since he or she is available without delay. Such incidence is not reported per se in studies contrary to the use of alternative techniques. Except for cases where tracheal intubation is easy, help is needed to perform a BURP manoeuvre or give a gum elastic bougie or a stylet for example.

Interestingly, Jones *et al.* studied the impact of the use the C-MAC<sup>®</sup> videolaryngoscope (Karl Storz Endoscopy, Slough, Berkshire, UK) on nurse anaesthetist working practices and training which has not previously been reported.<sup>21</sup> Most respondents claimed that the videolaryngoscope improved team work with the anaesthesiologist and allow anticipation of the required alternative technique by observing the view at laryngoscopy on a screen. Laryngoscopy is thus moving from an individual process to a shared procedure. Therefore, it is better to use a screen separate from the videolaryngoscope. The participation of the nurse facilitated by the glottic visualization is particularly



1  
2  
3 valuable when he or she performs a BURP to quickly find the most efficient gesture avoiding also a  
4  
5 worsening of the glottic visualization.<sup>22</sup>  
6  
7  
8  
9

10 Alternative techniques were used at a similar incidence in both groups, mainly the backward, upward,  
11  
12 and rightward pressure (BURP) in around 40% of the patients and the use of a gum elastic bougie  
13  
14 (railroading technique) in around 10% of the patients. Such incidence of use of BURP is not surprising  
15  
16 in that incidences of 23%<sup>19</sup> and 36%<sup>23</sup> have been reported previously. High incidence of their use is  
17  
18 probably explained by the fear of dental breakage, with an incidence up to 0.2% of all general  
19  
20 anaesthesia procedures, is responsible for 40% of the complaints against anaesthesiologists in  
21  
22 France.<sup>24</sup>  
23  
24

25 The BURP manoeuvre improves laryngoscopic visualization more easily than simple back pressure on  
26  
27 the larynx<sup>25</sup> and limits the forces exerted during laryngoscopy.<sup>26, 27</sup> However, the best condition is  
28  
29 represented when the assistant can view the laryngeal view in real time on a remote screen during  
30  
31 intubation to adapt the BURP to have the best glottic view.<sup>28</sup> The McGrath MAC videolaryngoscope has  
32  
33 not this possibility contrary to other videolaryngoscopes which have the possibility to have a remote  
34  
35 screen and thus be accessible to all participants (Airtraq<sup>®</sup>, Glidescope<sup>®</sup>, and King Vision<sup>®</sup> for example).  
36  
37 This is important because poor BURP practice is counterproductive and aggravates glottic vision.<sup>29</sup>  
38  
39

40 The secondly alternative technique used is tube rail-roading over a gum elastic bougie.<sup>30</sup> This technique  
41  
42 of choice when BURP does not align the oral, pharyngeal and laryngeal axes is more complex since it  
43  
44 requires good coordination between the members of the team.  
45  
46

47 It should also be noted that the anaesthesiologist chose to remove the screen cover to benefit from  
48  
49 the video function of the videolaryngoscope in 7% of the cases.  
50  
51

52 Finally, complications noticed during the induction-intubation sequence and after it up to the next day  
53  
54 were similar in both groups. Contrary to others who used a Glide Scope, we did not find that the use  
55  
56 of a videolaryngoscope decreased the incidence and severity of sore throat and hoarseness after  
57  
58 tracheal intubation.<sup>31</sup>  
59  
60

1  
2  
3  
4  
5 The strengths of the study come from the usual practice of the centres which were used, including  
6 especially the staffing ratio with one anaesthesiologist and one nurse anaesthetist (1 to 1) in each case.  
7

8  
9 But this permanent presence of a two-person team may have induced a bias because it facilitates the  
10 practice of an alternative technique. Another strength is the use of the same laryngoscope in both  
11 groups, the only difference being the use or not of the video screen. The last strength is that the  
12 present study is the first single blinded study since most of the criteria of judgment, in particular the  
13 main criterion, are obtained from a video recording of the intubation sequence without the possibility  
14 for the evaluator to know if the video function of the McGrath MAC videolaryngoscope was used.  
15  
16

17  
18 One weakness comes from the choice of the McGrath MAC videolaryngoscope. We chose this device  
19 since it requires limited training because of its similarity to the Macintosh laryngoscope with especially  
20 a similar blade. Another reason for its choice was its small size and low cost compared with other  
21 videolaryngoscopes, those with a swivelling or remote screen which may optimize the help, especially  
22 for the application of BURP. Consequently, our results cannot be generalized to other  
23 videolaryngoscopes which differ by the shape of the blade, and the existence or not of a channel.  
24  
25 Another point explaining why generalization is not possible is that our procedure includes the  
26 simultaneous presence of an anaesthesiologist and a nurse anaesthetist as is the rule in the health care  
27 institutions that participated in the study, but this practice is far from being the rule. In these  
28 institutions, anaesthesiologists and nurse anaesthetists have an identical practice when intubation  
29 concerns patients with no particular risk of access to the airways. Other weakness are the risk of 7%  
30 misclassification when using the Arné score to predict difficult intubation<sup>11</sup> and the large number of  
31 patients who were not seen the day after the operation, which makes the postoperative data very  
32 questionable.  
33  
34  
35  
36  
37  
38  
39  
40  
41  
42  
43  
44  
45  
46  
47  
48  
49  
50  
51  
52  
53  
54  
55  
56  
57  
58  
59  
60

## Conclusion

The Difficult Airway Society (DAS) guidelines for unanticipated difficult intubation recommend that all anaesthesiologists are trained to use a videolaryngoscope and that they have immediate access to one<sup>5</sup> and several authors have called for videolaryngoscopes to be used for all intubations.<sup>9</sup> One would have expected that the use of a videolaryngoscope, i.e. the introduction of a new technology, would have changed the practice of intubation. In patients at low risk of intubation difficulty, the expected benefit should have been greater autonomy for the person performing the procedure. Our results do not confirm this hypothesis.

## Acknowledgements relating to this article

Assistance with the study: We would like to thank Polly GOBIN and by American Journal Experts for their linguistic help.

Funding: This research received no specific grant from any funding agency in the public, commercial or not-for-profit sectors

Conflicts of interest: None.

Presentation: None.

## Authors contribution

OB, XP, JMD, MF and MLG have contribute substantially to conception and design of the study.

OB, ZC, JO, LAT, XP, SM, MLG have contribute substantially to acquisition of data.

All authors have participated to the analysis and interpretation of data.

TK performed the statistical analysis.

MF has written the first draft.

MF has taken responsibility for the integrity of the work as a whole, from inception to published article.

All authors have revised it critically for important intellectual content.

All authors approve the final version.

## REFERENCES

1. Caplan RA, Posner KL, Ward RJ, Cheney FW. Adverse respiratory events in anesthesia: a closed claims analysis. *Anesthesiology* 1990; 72:828-33.
2. Lienhart A, Auroy Y, Pequignot F *et al.* Survey of anesthesia-related mortality in France. *Anesthesiology* 2006; 105:1087-97.
3. Cook TM, Scott S, Mihai R. Litigation related to airway and respiratory complications of anaesthesia: an analysis of claims against the NHS in England 1995-2007. *Anaesthesia* 2010; 65:556-63.
4. Apfelbaum JL, Hagberg CA, Caplan RA *et al.* Practice guidelines for management of the difficult airway: an updated report by the American Society of Anesthesiologists Task Force on Management of the Difficult Airway. *Anesthesiology* 2013; 118:251-70.
5. Frerk C, Mitchell VS, McNarry AF *et al.* Difficult Airway Society 2015 guidelines for management of unanticipated difficult intubation in adults. *Br J Anaesth* 2015; 115:827-48.
6. Pieters BMA, Maas EHA, Knape JTA, van Zundert AAJ. Videolaryngoscopy vs. direct laryngoscopy use by experienced anaesthetists in patients with known difficult airways: a systematic review and meta-analysis. *Anaesthesia* 2017; 72:1532-41.
7. Lewis SR, Butler AR, Parker J, Cook TM, Schofield-Robinson OJ, Smith AF. Videolaryngoscopy versus direct laryngoscopy for adult patients requiring tracheal intubation: a Cochrane Systematic Review. *Br J Anaesth* 2017; 119:369-83.
8. Xue FS, Liu GP, Sun C. Videolaryngoscope as a standard intubation device. *Br J Anaesth* 2015; 115:137-8.
9. Zaouter C, Calderon J, Hemmerling TM. Videolaryngoscopy as a new standard of care. *Br J Anaesth* 2015; 114:181-3.
10. Cook TM, Boniface NJ, Seller C *et al.* Universal videolaryngoscopy: a structured approach to conversion to videolaryngoscopy for all intubations in an anaesthetic and intensive care department. *Br J Anaesth* 2018; 120:173-80.

- 1  
2  
3 11. Arne J, Descoins P, Fusciardi J *et al*. Preoperative assessment for difficult intubation in general and  
4  
5 ENT surgery: predictive value of a clinical multivariate risk index. *Br J Anaesth* 1998; 80:140-146.  
6
- 7 12. Langeron O, Bourgain JL, Laccoureye O, Legras A, Orliaguet G. [Difficult airway algorithms and  
8  
9 management]. *Ann Fr Anesth Reanim* 2008; 27:41-5.  
10
- 11 13. Cormack RS. Cormack-Lehane classification revisited. *Br J Anaesth* 2010; 105:867-868.  
12
- 13 14. Levitan RM, Ochroch EA, Kush S, Shofer FS, Hollander JE. Assessment of airway visualization:  
14  
15 validation of the percentage of glottic opening (POGO) scale. *Acad Emerg Med* 1998; 5:919-23.  
16
- 17 15. Adnet F, Borron SW, Racine SX *et al*. The intubation difficulty scale (IDS): proposal and evaluation  
18  
19 of a new score characterizing the complexity of endotracheal intubation. *Anesthesiology* 1997;  
20  
21 87:1290-7.  
22
- 23 16. Kraus MW, Huang C, Keltner D. Tactile communication, cooperation, and performance: an  
24  
25 ethological study of the NBA. *Emotion* 2010; 10:745-9.  
26
- 27 17. Stout DM, Bishop MJ, Dwersteg JF, Cullen BF. Correlation of endotracheal tube size with sore throat  
28  
29 and hoarseness following general anesthesia. *Anesthesiology* 1987; 67:419-21.  
30
- 31 18. Capan LM, Bruce DL, Patel KP, Turndorf H. Succinylcholine-induced postoperative sore throat.  
32  
33 *Anesthesiology* 1983; 59:202-6.  
34
- 35 19. Adnet F, Racine SX, Borron SW *et al*. A survey of tracheal intubation difficulty in the operating room:  
36  
37 a prospective observational study. *Acta Anaesthesiol Scand* 2001; 45:327-2.  
38
- 39 20. Hoshijima H, Mihara T, Maruyama K *et al*. McGrath videolaryngoscope versus Macintosh  
40  
41 laryngoscope for tracheal intubation: A systematic review and meta-analysis with trial sequential  
42  
43 analysis. *J Clin Anesth* 2018; 46:25-32.  
44
- 45 21. Jones L, Mulcahy K, Fox J, Cook TM, Kelly FE. C-MAC((c)) videolaryngoscopy: The anaesthetic  
46  
47 assistant's view. *J Perioper Pract* 2018; 28:83-9.  
48
- 49 22. Cook TM. The cricoid debate - balancing risks and benefits. *Anaesthesia* 2016; 71:721-2.  
50  
51  
52  
53  
54  
55  
56  
57  
58  
59  
60

- 1  
2  
3 23. Akhtar M, Ali Z, Hassan N, Mehdi S, Wani GM, Mir AH. A randomized study comparing the sniffing  
4 position with simple head extension for glottis visualization and difficulty in intubation during direct  
5 laryngoscopy. *Anesthesia, Essays and Researches* 2017; 11:762-6.  
6  
7  
8  
9  
10 24. Nouette-Gaulain K, Lenfant F, Jacquet-Francillon D *et al.* [French clinical guidelines for prevention  
11 of perianaesthetic dental injuries: long text]. *Ann Fr Anesth Reanim* 2012; 31:213-23.  
12  
13  
14 25. Takahata O, Kubota M, Mamiya K *et al.* The efficacy of the "BURP" maneuver during a difficult  
15 laryngoscopy. *Anesth Analg* 1997; 84:419-21.  
16  
17  
18  
19 26. Bishop MJ, Harrington RM, Tencer AF. Force applied during tracheal intubation. *Anesth Analg* 1992;  
20 74:411-4.  
21  
22  
23 27. Bucx MJ, van der Vegt MH, Snijders CJ, Stijnen T, Wesselink PR. Transverse forces exerted on the  
24 maxillary incisors during laryngoscopy. *Can J Anaesth* 1996; 43:665-71.  
25  
26  
27  
28 28. Loughnan TE, Gunasekera E, Tan TP. Improving the C-MAC video laryngoscopic view when applying  
29 cricoid pressure by allowing access of assistant to the video screen. *Anaesth Intensive Care* 2012;  
30 40:128-30.  
31  
32  
33  
34 29. Snider DD, Clarke D, Finucane BT. The "BURP" maneuver worsens the glottic view when applied in  
35 combination with cricoid pressure. *Can J Anaesth* 2005; 52:100-4.  
36  
37  
38  
39 30. Macintosh RR. An aid to oral intubation. *BMJ* 1949; 1:28.  
40  
41  
42 31. Najafi A, Imani F, Makarem J *et al.* Postoperative sore throat after laryngoscopy with macintosh or  
43 glide scope video laryngoscope blade in normal airway patients. *Anesth Pain Med* 2014; 4:e15136.  
44  
45  
46  
47  
48  
49  
50  
51  
52  
53  
54  
55  
56  
57  
58  
59  
60

1  
2  
3 **Legend of Figure 1**  
4

5 Flow chart  
6

7  
8 No-Video Group: intubation was performed using a McGrath Mac videolaryngoscope with its screen  
9  
10 deactivated  
11

12 Video group: intubation was performed using a McGrath Mac videolaryngoscope with its screen  
13  
14 activated  
15

16 No VR: No video recording  
17  
18  
19  
20  
21  
22  
23  
24  
25  
26  
27  
28  
29  
30  
31  
32  
33  
34  
35  
36  
37  
38  
39  
40  
41  
42  
43  
44  
45  
46  
47  
48  
49  
50  
51  
52  
53  
54  
55  
56  
57  
58  
59  
60

For peer review only



Table 1. Patient characteristics

|                                                         | Video group<br>(n=133)      | No-Video group<br>(n=123)   |
|---------------------------------------------------------|-----------------------------|-----------------------------|
| Male patients                                           | 61 (45.9)                   | 58 (47.1)                   |
| Age, years                                              | 58 (23)<br>[37.2 - 54.7]    | 60 (26)<br>[38.3 - 56.4]    |
| Body mass index, kg/m <sup>2</sup>                      | 25.1 (6.3)<br>[24.2 - 26.1] | 24.7 (5.8)<br>[23.7 - 25.4] |
| Arné score [11]                                         | 2 (5)<br>[2 - 3]            | 2 (4)<br>[2 - 2]            |
| Previous knowledge of difficult intubation              | 1 (0.8)<br>[0.0 - 4.1]      | 1 (0.8)<br>[0.0 - 4.4]      |
| Pathologies associated with difficult intubation        | 1 (0.8)<br>[0.0 - 4.1]      | 0                           |
| Clinical symptoms of airway pathology                   | 6 (4.5)<br>[1.7 - 9.6]      | 6 (4.9)<br>[1.8 - 10.3]     |
| Interincisor gap (<25 mm) and limited mandible luxation | 0                           | 0                           |
| Thyromental distance < 65 mm                            | 4 (3.0)<br>[0.8 - 7.5]      | 2 (1.6)<br>[0.2 - 5.7]      |
| Maximum range of head and neck movement ≤ 80°           | 4 (3.0)<br>[0.8 - 7.5]      | 1 (0.8)<br>[0.0 - 4.4]      |
| Mallampati score                                        |                             |                             |
| 1                                                       | 71 (53.4)<br>[44.5 - 62.1]  | 69 (56.1)<br>[46.9 - 65.0]  |
| 2                                                       | 51 (38.3)<br>[30.0 - 47.2]  | 42 (34.1)<br>[25.8 - 43.2]  |
| 3                                                       | 10 (7.5)<br>[3.7 - 13.4]    | 12 (9.7)<br>[5.1 - 16.4]    |
| 4                                                       | 1 (0.8)<br>[0.0 - 4.1]      | 0                           |

The results are presented as number (proportion) [95% CI of the percentage] for categorical variables and as median (interquartile range) [95% CI of the median] for continuous variables.

Table 2. Intubation variables

|                                                | Video group<br>(n=133)      | No-Video group (n=123)         | P value      |
|------------------------------------------------|-----------------------------|--------------------------------|--------------|
| Required assistance by the additional person   | 48 (36.1)<br>[27.9 - 44.9]  | 56 (45.5)<br>[95% 36.5 - 54.7] | 0.12         |
| Intubation Difficulty Scale (IDS)              |                             |                                | <b>0.009</b> |
| IDS = 0                                        | 77 (57.9)<br>[49.0 - 66.4]  | 50 (40.6)<br>[31.9 - 49.9]     |              |
| 0 < IDS ≤ 5                                    | 55 (41.3)<br>[32.9 - 50.2]  | 68 (55.3)<br>[46.1 - 64.2]     |              |
| > 5                                            | 1 (0.8)<br>[0.0 - 4.1]      | 5 (4.1)<br>[1.3 - 9.2]         |              |
| Number of attempts                             |                             |                                | 0.24         |
| 1                                              | 122 (91.7)<br>[87.0 - 96.4] | 112 (91.1)<br>[86.0 - 96.1]    |              |
| 2                                              | 10 (7.5)<br>[3.0 - 12.0]    | 6 (4.9)<br>[1.1 - 8.7]         |              |
| 3                                              | 1 (0.8)<br>[0.0 - 2.2]      | 4 (3.2)<br>[0.1 - 6.4]         |              |
| 4                                              | 0 (0.0)<br>[0.0 - 0.0]      | 1 (0.8)<br>[0.0 - 2.4]         |              |
| Complementary techniques                       |                             |                                |              |
| BURP                                           | 46 (34.6)<br>[26.6 - 43.3]  | 53 (43.1)<br>[34.2 - 52.3]     | 0.16         |
| Railroading the tube over a gum elastic bougie | 16 (12.0)<br>[7.0 - 18.8]   | 13 (10.6)<br>[5.7 - 17.4]      | 0.71         |

Table 2. Intubation variables (continued)

|                                                                           | Video group<br>(n=133)      | No-Video group<br>(n=123)  | P value          |
|---------------------------------------------------------------------------|-----------------------------|----------------------------|------------------|
| Cormack and Lehane grade                                                  |                             |                            | <b>&lt;0.001</b> |
| 1                                                                         | 111 (83.5)<br>[76.0 - 89.3] | 63 (51.2)<br>[42.0 - 60.3] |                  |
| 2a                                                                        | 19 (14.3)<br>[8.8 - 21.4]   | 33 (26.8)<br>[19.2 - 35.6] |                  |
| 2b                                                                        | 1 (0.8)<br>[0.0 - 4.1]      | 18 (14.6)<br>[8.9 - 22.1]  |                  |
| 3                                                                         | 2 (1.5)<br>[0.2 - 5.3]      | 9 (7.3)<br>[3.4 - 13.4]    |                  |
| Percentage of glottic opening score                                       | 100 (10)<br>[100 - 100]     | 80 (40)<br>[80 - 90]       | <b>&lt;0.001</b> |
| Vocal cord position, abduction                                            | 133 (100)<br>[100 - 100]    | 123 (100)<br>[100 - 100]   |                  |
| Abnormal traction force                                                   | 13 (9.8)<br>[5.3 - 16.1]    | 27 (21.9)<br>[15.0 - 30.3] | <b>0.007</b>     |
| Oesophageal Intubation                                                    | 4 (3.1)<br>[0.8 - 7.5]      | 2 (1.6)<br>[0.2 - 5.7]     | 0.68             |
| Removing the cover                                                        |                             | 9 (7.3)<br>[2.7 - 11.9]    |                  |
| Time between the introduction of the McGrath and the third capnogram, sec | 50 (31)<br>[46 - 57] {113}  | 49 (31)<br>[42 - 53] {104} | 0.13             |
| Ease of intubation, 0 (very easy) - 10 (very difficult)                   | 0 (2)<br>[0 - 0]            | 2 (4)<br>[1 - 2]           | <b>&lt;0.001</b> |

The results are presented as number (proportion) [95% CI of the percentage] for categorical variables and as median (interquartile range) [95% CI of the median] for continuous variables.

In cases in which the data are incomplete, the number of available data points is indicated between curly brackets {}.

Table 3. Bispectral index, heart rate and arterial pressure measurements

|     | Group                 | Before<br>induction            | Before<br>intubation          | After<br>intubation           | Difference<br>between<br>before and<br>after<br>intubation | Before<br>intubation<br>vs.<br>after<br>intubation | Video<br>vs.<br>No-<br>Video<br>group |
|-----|-----------------------|--------------------------------|-------------------------------|-------------------------------|------------------------------------------------------------|----------------------------------------------------|---------------------------------------|
|     |                       |                                |                               |                               |                                                            |                                                    | P-value                               |
| BIS | Video<br>group        | 94 (8)<br>[93 – 97]<br>{74}    | 40 (19)<br>[37 – 45]<br>{88}  | 44 (18)<br>[40 – 47]<br>{102} | 2 (15)<br>(0 – 5) {85}                                     | 0.11                                               | 0.20                                  |
|     | No-<br>Video<br>group | 96 (6)<br>[94 – 97]<br>{75}    | 46 (21)<br>[42 – 48]<br>{84}  | 50 (17)<br>[46 – 53]<br>{89}  | 5 (17)<br>(2 – 9) {79}                                     | <b>0.04</b>                                        |                                       |
| HR  | Video<br>group        | 74 (20)<br>[71 - 78]<br>{129}  | 67 (16)<br>[63 - 70]<br>{130} | 79 (27)<br>[75 - 82]<br>{131} | 9 (17)<br>(7 - 14)<br>{129}                                | <b>&lt;0.001</b>                                   | 0.103                                 |
|     | No-<br>Video<br>group | 72 (22)<br>[68 - 76]<br>{115}  | 65 (16)<br>[61 - 69]<br>{121} | 83 (23)<br>[78 - 86]<br>{121} | 13 (19)<br>(10 - 19)<br>{120}                              | <b>&lt;0.001</b>                                   |                                       |
| MAP | Video<br>group        | 98 (20)<br>[93 - 100]<br>{128} | 74 (24)<br>[72 - 81]<br>{125} | 82 (28)<br>[78 - 87]<br>{125} | 4 (25)<br>(0 - 7) {121}                                    | <b>0.007</b>                                       | <b>0.04</b>                           |
|     | No-<br>Video<br>group | 99 (22)<br>[97 - 104]<br>{114} | 77 (22)<br>[74 - 84]<br>{118} | 87 (41)<br>[82 - 93]<br>{113} | 12 (39)<br>(5 - 20)<br>{110}                               | <b>&lt;0.001</b>                                   |                                       |

The results are presented as median (interquartile range) [95% CI of the median].

Number of available data points is indicated between curly brackets {}.

BIS = Bispectral index, HR = heart rate (beats per minute), PAM = mean blood pressure (mmHg)

Table 4. Intra- and postoperative complications

|                                                          | Video group<br>(n=133)     | No-Video group<br>(n=123)  | P value |
|----------------------------------------------------------|----------------------------|----------------------------|---------|
| Intraoperative complications                             |                            |                            |         |
| Oxygen desaturation (peripheral oxygen saturation < 92%) | 2 (1.5)<br>[0.2 - 5.3]     | 0                          | 0.50    |
| Hypotension having required treatment                    | 4 (3.0)<br>[0.1 - 5.9]     | 3 (2.4)<br>[0.0 - 5.2]     | 0.99    |
| Hypertension having required treatment                   | 0 (0.0)<br>[0.0 - 0.0]     | 1 (0.0)<br>[0.0 - 2.4]     | 0.48    |
| Dental injury                                            | 0                          | 0                          |         |
| Postoperative complications                              |                            |                            |         |
| Hoarseness                                               | {n=34}                     | {n=37}                     | 0.99    |
| Grade 1                                                  | 23 (68)<br>[49.5 - 82.6]   | 25 (68)<br>[50.2 - 82.0]   |         |
| Grade 2                                                  | 11 (32)<br>[17.4 - 50.5]   | 12 (32)<br>[18.0 - 49.8]   |         |
| Grade 3                                                  | 0                          | 0                          |         |
| Sore throat                                              | {n=42}                     | {n=33}                     | 0.41    |
| Grade 1                                                  | 33 (78.6)<br>[63.2 - 89.7] | 23 (69.7)<br>[51.3 - 84.4] |         |
| Grade 2                                                  | 8 (19.0)<br>[8.6 - 34.1]   | 10 (30.3)<br>[15.6 - 48.7] |         |
| Grade 3                                                  | 1 (2.4)<br>[0.1 - 12.6]    | 0                          |         |

The results are presented as number (proportion) [95% CI of the percentage].

When the data were incomplete, the number of available data points is indicated between curly brackets {}.

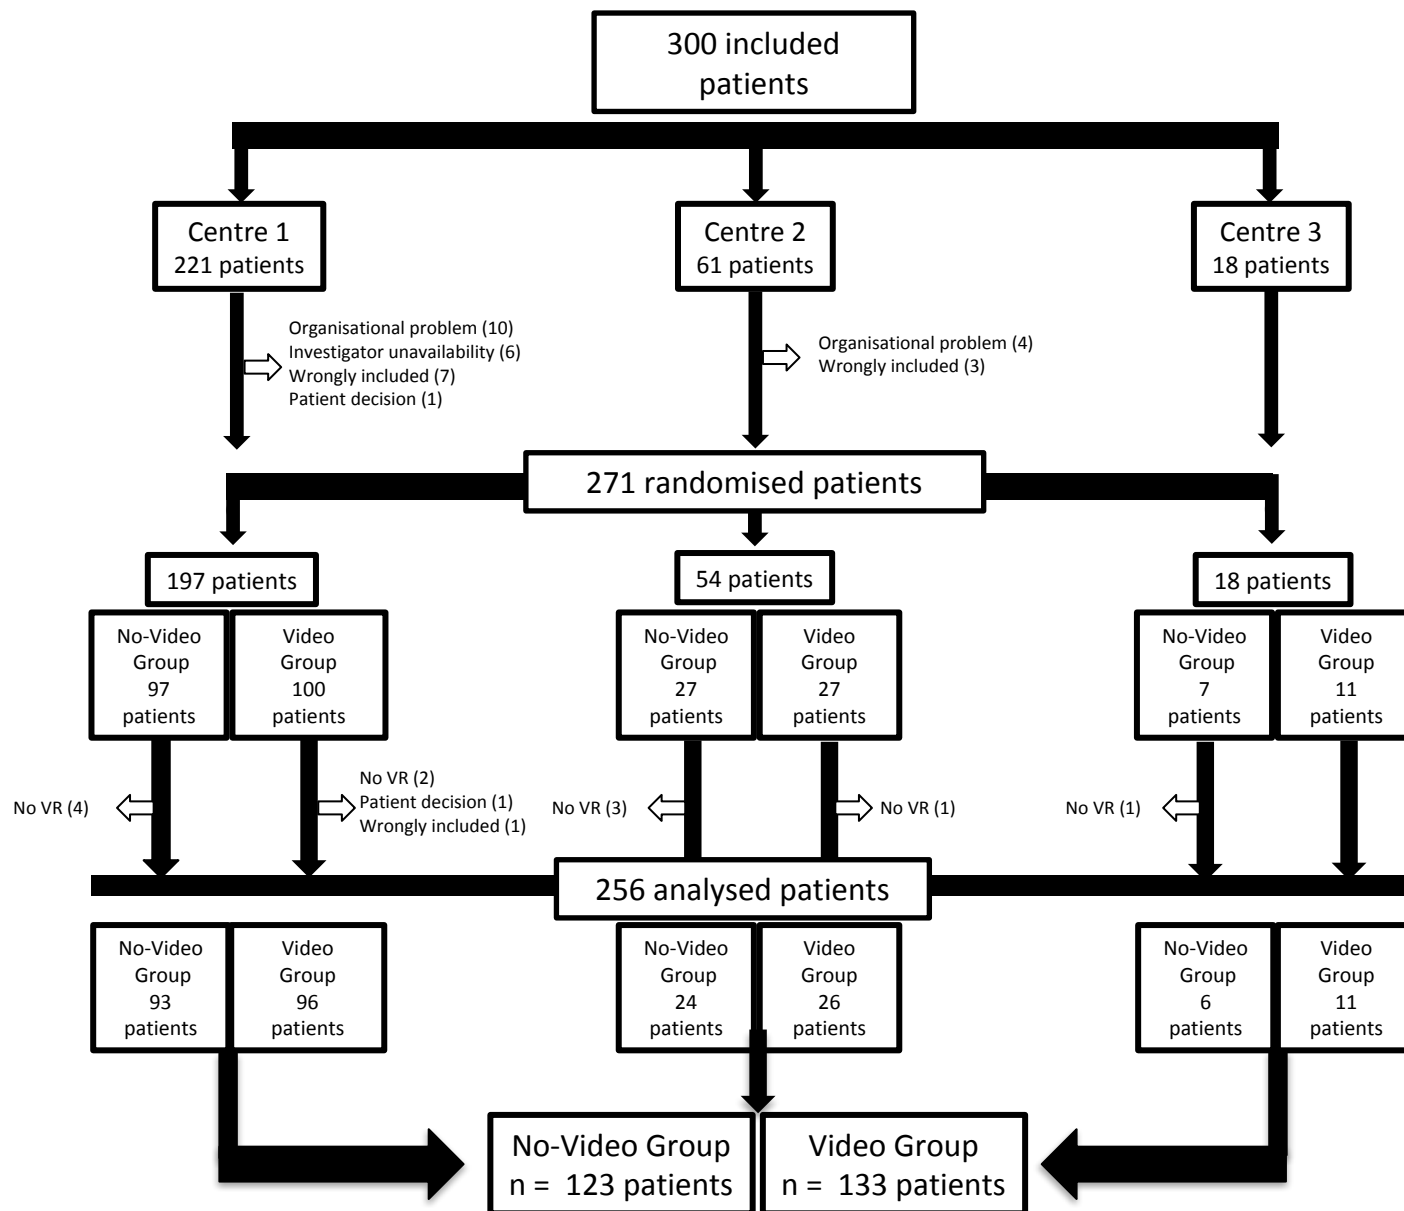

Figure 1

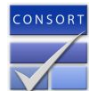

## CONSORT 2010 checklist of information to include when reporting a randomised trial\*

| Section/Topic                    | Item No | Checklist item                                                                                                                                                                              | Reported on page No |
|----------------------------------|---------|---------------------------------------------------------------------------------------------------------------------------------------------------------------------------------------------|---------------------|
| <b>Title and abstract</b>        |         |                                                                                                                                                                                             |                     |
|                                  | 1a      | Identification as a randomised trial in the title                                                                                                                                           | 1                   |
|                                  | 1b      | Structured summary of trial design, methods, results, and conclusions (for specific guidance see CONSORT for abstracts)                                                                     | 2                   |
| <b>Introduction</b>              |         |                                                                                                                                                                                             |                     |
| Background and objectives        | 2a      | Scientific background and explanation of rationale                                                                                                                                          | 5                   |
|                                  | 2b      | Specific objectives or hypotheses                                                                                                                                                           | 5                   |
| <b>Methods</b>                   |         |                                                                                                                                                                                             |                     |
| Trial design                     | 3a      | Description of trial design (such as parallel, factorial) including allocation ratio                                                                                                        | 6                   |
|                                  | 3b      | Important changes to methods after trial commencement (such as eligibility criteria), with reasons                                                                                          | NA                  |
| Participants                     | 4a      | Eligibility criteria for participants                                                                                                                                                       | 6                   |
|                                  | 4b      | Settings and locations where the data were collected                                                                                                                                        | 6 and Figure 1      |
| Interventions                    | 5       | The interventions for each group with sufficient details to allow replication, including how and when they were actually administered                                                       | 7                   |
| Outcomes                         | 6a      | Completely defined pre-specified primary and secondary outcome measures, including how and when they were assessed                                                                          | 9                   |
|                                  | 6b      | Any changes to trial outcomes after the trial commenced, with reasons                                                                                                                       | NA                  |
| Sample size                      | 7a      | How sample size was determined                                                                                                                                                              | 10                  |
|                                  | 7b      | When applicable, explanation of any interim analyses and stopping guidelines                                                                                                                | NA                  |
| <b>Randomisation:</b>            |         |                                                                                                                                                                                             |                     |
| Sequence generation              | 8a      | Method used to generate the random allocation sequence                                                                                                                                      | 6-7                 |
|                                  | 8b      | Type of randomisation; details of any restriction (such as blocking and block size)                                                                                                         | 6-7                 |
| Allocation concealment mechanism | 9       | Mechanism used to implement the random allocation sequence (such as sequentially numbered containers), describing any steps taken to conceal the sequence until interventions were assigned | 7                   |
| Implementation                   | 10      | Who generated the random allocation sequence, who enrolled participants, and who assigned participants to interventions                                                                     | 7                   |
| Blinding                         | 11a     | If done, who was blinded after assignment to interventions (for example, participants, care providers, those                                                                                | 9                   |

|                                                      |     |                                                                                                                                                   |              |
|------------------------------------------------------|-----|---------------------------------------------------------------------------------------------------------------------------------------------------|--------------|
|                                                      |     | assessing outcomes) and how                                                                                                                       |              |
|                                                      | 11b | If relevant, description of the similarity of interventions                                                                                       | 7            |
| Statistical methods                                  | 12a | Statistical methods used to compare groups for primary and secondary outcomes                                                                     | 10           |
|                                                      | 12b | Methods for additional analyses, such as subgroup analyses and adjusted analyses                                                                  | NA           |
| <b>Results</b>                                       |     |                                                                                                                                                   |              |
| Participant flow (a diagram is strongly recommended) | 13a | For each group, the numbers of participants who were randomly assigned, received intended treatment, and were analysed for the primary outcome    | Figure 1     |
|                                                      | 13b | For each group, losses and exclusions after randomisation, together with reasons                                                                  | Figure 1     |
| Recruitment                                          | 14a | Dates defining the periods of recruitment and follow-up                                                                                           | 12           |
|                                                      | 14b | Why the trial ended or was stopped                                                                                                                | NA           |
| Baseline data                                        | 15  | A table showing baseline demographic and clinical characteristics for each group                                                                  | Table 1      |
| Numbers analysed                                     | 16  | For each group, number of participants (denominator) included in each analysis and whether the analysis was by original assigned groups           | Tables       |
| Outcomes and estimation                              | 17a | For each primary and secondary outcome, results for each group, and the estimated effect size and its precision (such as 95% confidence interval) | Tables       |
|                                                      | 17b | For binary outcomes, presentation of both absolute and relative effect sizes is recommended                                                       | --           |
| Ancillary analyses                                   | 18  | Results of any other analyses performed, including subgroup analyses and adjusted analyses, distinguishing pre-specified from exploratory         | NA           |
| Harms                                                | 19  | All important harms or unintended effects in each group (for specific guidance see CONSORT for harms)                                             | 13 – Table 4 |
| <b>Discussion</b>                                    |     |                                                                                                                                                   |              |
| Limitations                                          | 20  | Trial limitations, addressing sources of potential bias, imprecision, and, if relevant, multiplicity of analyses                                  | 16           |
| Generalisability                                     | 21  | Generalisability (external validity, applicability) of the trial findings                                                                         | 16           |
| Interpretation                                       | 22  | Interpretation consistent with results, balancing benefits and harms, and considering other relevant evidence                                     | 14           |
| <b>Other information</b>                             |     |                                                                                                                                                   |              |
| Registration                                         | 23  | Registration number and name of trial registry                                                                                                    | 3            |
| Protocol                                             | 24  | Where the full trial protocol can be accessed, if available                                                                                       | On request   |
| Funding                                              | 25  | Sources of funding and other support (such as supply of drugs), role of funders                                                                   | 18           |

\*We strongly recommend reading this statement in conjunction with the CONSORT 2010 Explanation and Elaboration for important clarifications on all the items. If relevant, we also recommend reading CONSORT extensions for cluster randomised trials, non-inferiority and equivalence trials, non-pharmacological treatments, herbal interventions, and pragmatic trials. Additional extensions are forthcoming: for those and for up to date references relevant to this checklist, see [www.consort-statement.org](http://www.consort-statement.org).



# BMJ Open

## Influence of videolaryngoscopy using McGrath Mac™ on the need for a helper to perform intubation during general anaesthesia: A multicentre randomised Video - No-Video trial

|                                 |                                                                                                                                                                                                                                                                                                                                                                                                                                                                                                                                                                                                                                                                                                                                                                                                                                                                                    |
|---------------------------------|------------------------------------------------------------------------------------------------------------------------------------------------------------------------------------------------------------------------------------------------------------------------------------------------------------------------------------------------------------------------------------------------------------------------------------------------------------------------------------------------------------------------------------------------------------------------------------------------------------------------------------------------------------------------------------------------------------------------------------------------------------------------------------------------------------------------------------------------------------------------------------|
| Journal:                        | <i>BMJ Open</i>                                                                                                                                                                                                                                                                                                                                                                                                                                                                                                                                                                                                                                                                                                                                                                                                                                                                    |
| Manuscript ID                   | bmjopen-2021-049275.R1                                                                                                                                                                                                                                                                                                                                                                                                                                                                                                                                                                                                                                                                                                                                                                                                                                                             |
| Article Type:                   | Original research                                                                                                                                                                                                                                                                                                                                                                                                                                                                                                                                                                                                                                                                                                                                                                                                                                                                  |
| Date Submitted by the Author:   | 23-Jun-2021                                                                                                                                                                                                                                                                                                                                                                                                                                                                                                                                                                                                                                                                                                                                                                                                                                                                        |
| Complete List of Authors:       | Belze, Olivier; Groupe Clinique Ambroise Paré, Department of Anesthesiology<br>Coppere, Zoé; Fondation Ophtalmologique Adolphe de Rothschild, Department of Anaesthesiology<br>Ouattara, Jonathan; Paris Saint Joseph Hospital Group, Department of Anaesthesia<br>Thion, Laurie-Anne ; Fondation Ophtalmologique Adolphe de Rothschild, Department of Anaesthesia and Intensive Care<br>Paqueron, Xavier; Centre Clinical de Soyaux, Department of Anaesthesiology and Intensive Care<br>Devys, Jean-Michel; Service d'Anesthésie-Réanimation, Fondation Ophtalmologique Adolphe de Rothschild 25, rue Manin, F-75019 Paris, France<br>Ma, Sabrina; Hopital Foch, Department of Anesthesiology<br>Kennel, Titouan; Hopital Foch, Department of Research and Innovation<br>Fischler, Marc; Hopital Foch, Anesthesia<br>Le Guen, Morgan; Hopital Foch, Department of Anesthesiology |
| <b>Primary Subject Heading</b>: | Anaesthesia                                                                                                                                                                                                                                                                                                                                                                                                                                                                                                                                                                                                                                                                                                                                                                                                                                                                        |
| Secondary Subject Heading:      | Surgery                                                                                                                                                                                                                                                                                                                                                                                                                                                                                                                                                                                                                                                                                                                                                                                                                                                                            |
| Keywords:                       | Adult anaesthesia < ANAESTHETICS, Adult intensive & critical care < ANAESTHETICS, Adult surgery < SURGERY                                                                                                                                                                                                                                                                                                                                                                                                                                                                                                                                                                                                                                                                                                                                                                          |
|                                 |                                                                                                                                                                                                                                                                                                                                                                                                                                                                                                                                                                                                                                                                                                                                                                                                                                                                                    |

SCHOLARONE™  
Manuscripts



I, the Submitting Author has the right to grant and does grant on behalf of all authors of the Work (as defined in the below author licence), an exclusive licence and/or a non-exclusive licence for contributions from authors who are: i) UK Crown employees; ii) where BMJ has agreed a CC-BY licence shall apply, and/or iii) in accordance with the terms applicable for US Federal Government officers or employees acting as part of their official duties; on a worldwide, perpetual, irrevocable, royalty-free basis to BMJ Publishing Group Ltd ("BMJ") its licensees and where the relevant Journal is co-owned by BMJ to the co-owners of the Journal, to publish the Work in this journal and any other BMJ products and to exploit all rights, as set out in our [licence](#).

The Submitting Author accepts and understands that any supply made under these terms is made by BMJ to the Submitting Author unless you are acting as an employee on behalf of your employer or a postgraduate student of an affiliated institution which is paying any applicable article publishing charge ("APC") for Open Access articles. Where the Submitting Author wishes to make the Work available on an Open Access basis (and intends to pay the relevant APC), the terms of reuse of such Open Access shall be governed by a Creative Commons licence – details of these licences and which [Creative Commons](#) licence will apply to this Work are set out in our licence referred to above.

Other than as permitted in any relevant BMJ Author's Self Archiving Policies, I confirm this Work has not been accepted for publication elsewhere, is not being considered for publication elsewhere and does not duplicate material already published. I confirm all authors consent to publication of this Work and authorise the granting of this licence.

1  
2  
3 **Influence of videolaryngoscopy using McGrath Mac™ on the need for a helper to perform**  
4  
5 **intubation during general anaesthesia:**  
6  
7

8 **A multicentre randomised Video - No-Video trial**  
9

10 Running Title: Randomised Videolaryngoscopy trial for patients with normal airways  
11  
12  
13

14 Olivier Belze<sup>1</sup>, Zoe Coppere<sup>2</sup>, Jonathan Ouattara<sup>3</sup>, Laurie-Anne Thion<sup>2</sup>, Xavier Paqueron<sup>4</sup>,  
15  
16

17 Jean-Michel Devys<sup>2</sup>, Sabrina Ma<sup>1</sup>, Titouan Kennel<sup>5</sup>, Marc Fischler<sup>1</sup>,  
18  
19

20 and Morgan Le Guen<sup>1</sup>  
21  
22  
23

24 <sup>1</sup> Hôpital Foch, Department of Anaesthesia, Suresnes, France and Centre Médico-Chirurgical Ambroise  
25

26 Paré, Department of Anaesthesia, Neusthilly-sur-Seine, France  
27

28 <sup>2</sup> Fondation Adolphe de Rothschild, Department of Anaesthesia and Intensive Care, Paris, France  
29

30 <sup>3</sup> Hôpital Saint-Joseph, Department of Anaesthesia, Paris, France  
31  
32

33 <sup>4</sup> Centre Clinical, Department of Anaesthesia and Intensive Care, Soyaux, France  
34

35 <sup>5</sup> Hôpital Foch, Department of Research and Innovation, Suresnes, France  
36

37 Corresponding author: Marc Fischler, MD, Department of Anaesthesia, Hospital Foch, 40 rue Worth,  
38

39 Suresnes, France. Email: m.fischler@orange.fr; Phone: +33 1 46 25 24 42 (Business telephone) - +33 6  
40

41 09 68 78 54 (Mobile); Fax: +33 1 46 25 20 88  
42  
43  
44  
45  
46  
47  
48  
49  
50  
51  
52  
53  
54  
55  
56  
57  
58  
59  
60

## Abstract

**Objective:** We hypothesised that videolaryngoscopy modifies practice of tracheal intubation.

**Design:** Randomised single-blinded study (Video and No-Video groups).

**Setting:** Three institutions: One academic, one non-profit and one profit.

**Participants:** Patients >18 years, requiring orotracheal intubation, without predicted difficult intubation. Non-inclusion criterion was patients requiring a rapid-sequence intubation. 300 patients were included, 271 randomised, 256 analysed: 123 in the No-Video and 133 in the Video groups.

**Intervention:** Tracheal intubation using a McGrath Mac™ videolaryngoscope, the sequence being video recorded.

**Primary and secondary outcome measures:** The primary outcome was the proportion of intubations where assistance is necessary upon request of the operator. Secondary outcomes included intraoperative variables (intubation difficulty scale and its components, percentage of glottic opening score, oesophageal Intubation, duration of intubation, removal of the screen cover in the No-Video group, global evaluation of the ease of intubation, bispectral index, heart rate and blood pressure), intraoperative and postoperative complications (hoarseness or sore throat), and cooperation of the anaesthesiology team.

**Results:** Requirement for assistance was not decreased in the Video group: 36.1% [95% CI 27.9-44.9] versus 45.5% [95%CI 36.5-54.7] in the No-Video group,  $p=0.74$ ; Odds Ratio: 0.7 [0.4-1.1] and Absolute Risk: 0.10 [-0.03-0.22]. Intubation difficulty scale was similar in both groups ( $p=0.05$ ). Percentage of glottic opening score was better in the Video group (median of 100 [95% CI [100-100] and 80 [95%CI [80-90] in the no-Video group;  $p<0.001$ ) as Cormack and Lehane grade ( $p=0001$ ). Ease of intubation was considered better in the Video group ( $p<0.001$ ). Other secondary outcomes were similar between groups. Screen cover was removed in 7.3% (95%CI [2.7-11.9]) of the cases in the Video group. No serious adverse event occurred. Communication and behaviour within the anaesthesia team were appropriate in all cases.

1  
2  
3 **Conclusion:** In patients without predicted difficult intubation, videolaryngoscopy did not decrease the  
4  
5 requirement for assistance to perform intubation.  
6

7 **Trial registration:** Clinicaltrials.gov identifier: NCT02926144  
8  
9  
10  
11  
12  
13  
14  
15  
16  
17  
18  
19  
20  
21  
22  
23  
24  
25  
26  
27  
28  
29  
30  
31  
32  
33  
34  
35  
36  
37  
38  
39  
40  
41  
42  
43  
44  
45  
46  
47  
48  
49  
50  
51  
52  
53  
54  
55  
56  
57  
58  
59  
60

For peer review only

### Strengths and limitations of this study

- This study aimed to assess if the use of a videolaryngoscope modifies the practice of tracheal intubation in real life conditions.
- A major strength of this study performed on patients without a predicted difficult intubation was the choice of the main outcome: the need for help for the anaesthesiologist or the nurse anaesthetist in performing tracheal intubation.
- Permanent presence of a two-person team may have induced a bias because it facilitates the practice of an alternative technique.
- Another weakness comes from the choice of the McGrath MAC videolaryngoscope and, consequently, results cannot be generalized to other videolaryngoscopes which differ by the shape of the blade, and the existence or not of a channel.

## Introduction

Airway management remains a major concern for anaesthesiologists while related morbimortality is determinant for anaesthesia.<sup>1-3</sup> Securing the patient's airway is a critical step in providing general anaesthesia and several recommendations have been published regarding the practice of intubation in anaesthesia.<sup>4, 5</sup> Direct laryngoscopy using the original Macintosh laryngoscope has been the rule for the past half century; however a wide range of videolaryngoscopes has been developed in recent years to provide an indirect visualisation of the glottis via a camera. In patients with a suspected difficult airway, there is no doubt that videolaryngoscopy is associated with a significantly better view of the glottis, increases the first-attempt success and reduces mucosal trauma.<sup>6</sup>

In patients with no predicted difficult airway, no difference in failed intubation has been reported when comparing a videolaryngoscope and Macintosh laryngoscope.<sup>7</sup> Nevertheless some authors consider that the use of videolaryngoscopes must be generalised for all patients, even for those in whom preoperative assessment has not found evidence of a particular risk of access to the airways.<sup>8-10</sup>

In their analysis of the literature, Lewis *et al.*<sup>7</sup> emphasize the importance of the choice of the evaluation criteria used to compare the techniques: glottic view, time required for intubation, successful intubation particularly at the first-attempt, risks of complications like hypoxia or other respiratory complications, laryngeal or airway traumas, and sore throat in the post-anaesthesia care unit. Another question that needs to be asked when a new technology is proposed is: does this technology change the practice?

This randomised multicentre study done in our real-life conditions, presence of an anaesthesiologist and of a nurse anaesthetist during the induction-intubation period, compared two scenarios, both using the same videolaryngoscope, one using the video function and the other not, for orotracheal intubation of surgical patients without particular risk of access to the airways. The hypothesis was that the use of the videolaryngoscope modifies the practice of tracheal intubation, the main outcome being the need for help for the anaesthesiologist or the nurse anaesthetist in performing tracheal intubation.

## Methods

### *Ethics approval*

After approval by the Ethics Committee (Comité de Protection des Personnes Ile de France VIII, Boulogne Billancourt, France, n°160108, 19 February 2016, Chairman Bertrand MUSSETTA) and by the French Regulatory Office, and after registration on the web site ClinicalTrials.gov (NCT02926144, first Posted on October 6, 2016), patients were enrolled in the study after they gave their written informed consent including videorecording and blurring of patients faces if necessary. The complete protocol, registered with the competent authorities under the N° ID-RCP 2013-A01307-38, can be obtained on request. Patient and public were not involved in the design, or conduct, or reporting, or dissemination plans of the research.

### *Study Design, and Setting*

The McGrath Mac Videolaryngoscope versus McGrath Mac No-Video Laryngoscope for Orotracheal Intubation in Operating Room (Video - No-Video study) trial was an institutionally sponsored, single-blinded, multicentre, two parallel-groups randomised clinical trial (RCT) conducted at three Health Institutions in France (one academic, one non-profit and one profit).

### *Patient population*

Inclusion criteria were patients aged 18 years minimum, requiring general anaesthesia and oro-tracheal intubation with a single lumen tube, without a predicted difficult intubation (Arne score <11).<sup>11</sup> Non-inclusion criteria were currently pregnant or breastfeeding woman, out-patients who could not be contacted within 24 hours following surgery, patients requiring a rapid-sequence intubation, and patients for whom general anaesthesia using sufentanil, propofol, atracurium or rocuronium was not suitable.



1  
2  
3 Inclusion and exclusion criteria were assessed by an investigator who could be different from the one  
4  
5 who was to perform the intubation. Once in the operating room, inclusion criteria were confirmed by  
6  
7 the anaesthesiologist in charge and randomisation was managed online.  
8  
9

### 10 11 12 *Randomisation, Allocation Concealment*

13  
14 Centralized randomisation using fixed-size blocks had been performed by an independent  
15  
16 biostatistician not involved in the trial. The randomisation scheme was balanced 1:1 and stratified by  
17  
18 centre. Each patient received a unique patient number and a randomisation number (patient code)  
19  
20 when the investigator connected to an Interactive Web Response System managed by an independent  
21  
22 Contract Research Organization (Epiconcept Company, 75012, Paris, France) using a protected  
23  
24 password just before the induction of anaesthesia. Thus, patients were randomised into two groups:  
25  
26 a Video group, in which intubation is performed using a McGrath Mac videolaryngoscope with its  
27  
28 screen activated, and a No-Video group, in which intubation is performed using a McGrath Mac  
29  
30 videolaryngoscope with its screen hidden. The software used to allocate the patients to their group  
31  
32 also was in-live fulfilled to collect data by the investigator in an electronic report form, ensuring  
33  
34 concealment.  
35  
36  
37  
38  
39  
40

### 41 *Study Protocol*

42  
43 Patients received care during the induction and intubation periods from an anaesthesiologist and a  
44  
45 nurse anaesthetist as is usual in the hospitals where the protocol took place. All anaesthesiologists and  
46  
47 nurse anaesthetists had performed at least ten intubations with the McGrath Mac Videolaryngoscope.  
48  
49 This experience seems sufficient since the learning curve is steep especially among this population<sup>12</sup>  
50  
51 especially since the professionals received specific training pertaining to the study procedures prior to  
52  
53 the beginning of the trial including the fact that they must rely on the video screen in the Video group  
54  
55 and use the direct view in the No-Video group.  
56  
57  
58  
59  
60

1  
2  
3 Upon arrival in the operating room, a dedicated peripheral intravenous cannula for the administration  
4 of IV anaesthetics was placed on the forearm, and routine monitoring was performed including  
5 bispectral index monitoring and quantitative measurement of neuromuscular block at the adductor  
6 pollicis. Patients were positioned in dorsal decubitus with the head on a 7cm high pillow.  
7  
8 Preoxygenation was achieved using a face mask, and oxygen at a flow of 15 L/min or greater for at  
9  
10 least 3 minutes to achieve an end-tidal oxygen fraction of at least 90%.

11  
12  
13  
14  
15  
16 General anaesthesia was then induced by injecting sufentanil, propofol and a neuromuscular blocking  
17 agent (atracurium or rocuronium) once the patient was unconsciousness. Intubation was performed  
18  
19 by the anaesthesiologist or the nurse anaesthetist using the device allocated at random when  
20  
21 bispectral index was under 60 and when there was no more muscle response to the train of four  
22  
23 stimulation.

24  
25  
26  
27 Intubation was performed using the video screen of the device in the McGrath Mac Videolaryngoscope  
28 group (Video group) while the video screen was hidden with an opaque cover in the McGrath Mac No-  
29  
30 Video Laryngoscope group (No-Video group). Endotracheal tube size was 7 for women and 7.5 for men  
31  
32 with blades size 3 or 4 according the practitioner's preference.

33  
34  
35  
36 Asking for help from the other member of the anaesthetic team was at the discretion of the individual  
37  
38 performing intubation if he/she deemed it necessary to perform an easy and atraumatic intubation.

39  
40  
41 Complementary techniques consisted in (a) backward, upward and rightward pressure (BURP)  
42  
43 manoeuvre; (b) rail-roading the tube over a gum elastic bougie; (c) removing the opaque cover on the  
44  
45 video screen in the No-Video group or change in the operator. If all these techniques failed, other  
46  
47 manoeuvres could be used: (a) insertion of a stylet into the tube; (b) changing the blade; (c) removal  
48  
49 of the pillow. Rescue techniques (insertion of an Intubating Laryngeal Mask Airway, transtracheal  
50  
51 oxygenation, fiberoptic intubation, awakening) were considered if necessary according to the national  
52  
53 recommendations.<sup>13</sup> Number of intubation attempts, time to intubate or number of alternative  
54  
55 techniques were not limited by the protocol.  
56  
57  
58  
59  
60

1  
2  
3 After intubation, the cuff was inflated, the tube was connected to the ventilator, and intratracheal  
4  
5 tube position was confirmed by analysing the capnography curve.  
6

7 Anaesthesia was conducted according to good practices.  
8

9  
10 Patients were reviewed the following day. Sore throat and hoarseness were evaluated, and adverse  
11  
12 events collected by investigators not knowing the group to which the patient has been assigned.  
13  
14

### 15 16 *Data collection*

17  
18 All cases were video recorded by a person not involved in the study which followed a mandatory script.  
19  
20 This person, placed at the feet of the patient, was unable to see whether the screen of the  
21  
22 videolaryngoscope was activated. Video recording began with preoxygenation and ended with the  
23  
24 capnographic confirmation of successful tracheal intubation.  
25  
26

27 The framing of the videos was done in such a way that the patient's anonymity was respected.  
28  
29 Otherwise, the patient's face was blurred before analysis.  
30

31  
32 Analysis of each video was performed by two anaesthesiologists blinded to the study group since the  
33  
34 screen, transparent or opaque, of the videolaryngoscope was not apparent. The videos were reviewed  
35  
36 by both anaesthesiologists in case of discordance.  
37

38  
39 All the variables used for the study were retrieved from the video apart from the glottis exposure which  
40  
41 was recorded in real time by the person who performed the intubation using the Cormack and Lehane  
42  
43 modified score and the percentage of glottis opening scale (POGO) score.<sup>14,15</sup>  
44

45  
46 Timeline of measurement of each variable is summarised in a Supplementary Table.  
47  
48  
49

### 50 *Primary and secondary outcomes*

51  
52 The primary outcome, the proportion of orotracheal intubations where assistance was necessary  
53  
54 upon request of the operator, was obtained from the video of the intubation sequence.  
55

56  
57 Secondary outcomes included during the intubation period (1) the intubation difficulty scale,<sup>16</sup> (2) the  
58  
59 Cormack and Lehane grade of glottis visibility,<sup>14</sup> (3) the percentage of glottic opening scale score (POGO)  
60

1  
2  
3 score,<sup>15</sup> (4) the proportion of patients intubated using alternative techniques: (backward, upward and  
4  
5 rightward pressure (BURP), rail-roading the tube over a gum elastic bougie, insertion of a stylet in the  
6  
7 tube, laryngeal mask airway, fiberoptic endoscopy, or rescue percutaneous or surgical transtracheal  
8  
9 oxygenation ...), anaesthesia discontinuation, (5) the time from introduction of the McGrath  
10  
11 videolaryngoscope in the mouth to the confirmation of tracheal tube position based on partial pressure  
12  
13 of end-tidal exhaled carbon dioxide (third capnogram), (6) the proportion of patients having had an  
14  
15 oesophageal intubation, (7), the ease of intubation evaluated by the anaesthesiologist using a 11-level  
16  
17 numeric scale from 0 (very easy) to 10 (very difficult), (8) the requirement of an abnormal traction  
18  
19 force to intubate, (9) the heart rate and mean arterial pressure measured just before and after  
20  
21 intubation, (10) complications such as oxygen desaturation (peripheral oxygen saturation < 92%) or  
22  
23 hypotension having required treatment. The cooperation between members of the anaesthesiology  
24  
25 team during intubation was graded using a 4-point scale (0=no cooperation at all, 3=a great deal of  
26  
27 cooperation).<sup>17</sup>

28  
29  
30  
31  
32 The postoperative secondary outcomes included the proportion of patient suffering from hoarseness<sup>18</sup>  
33  
34 or sore throat<sup>19</sup> on postoperative day 1. Other adverse events will be also collected.  
35  
36  
37  
38

### 39 *Sample Size calculation*

40  
41 The number of patients to be included took into consideration the frequency with which external  
42  
43 laryngeal pressure is used. Adnet et al. published in 2001 a survey of tracheal intubation difficulty  
44  
45 among 1171 surgical patients and found that the Intubation Difficulty Scale was > 0 in 522 cases  
46  
47 (45%) and that external laryngeal pressure, requiring an assistant to help, was used in 271 of these  
48  
49 cases (23% of all patients).<sup>20</sup> Based on this data, the expected rate for the assistance of another  
50  
51 person for intubation was 25 % for patients in the No-Video group. Presuming that the video function  
52  
53 would decrease this proportion to 12.5 %, with type 1 error set at 5 % and power set at 80 %, 131  
54  
55 patients were needed in each group (i.e., 262 patients total). We planned to recruit 300 patients to  
56  
57 mitigate an attrition of the sample or the absence of values.  
58  
59  
60

### *Statistical Analyses*

Statistical analysis was conducted using the principle of the intention-to-treat analysis. Results are presented as number (proportion) [Confidence Interval 95 of the percentage] for categorical variables and compared by the Chi-square test when the number of observations was greater than five, and by the exact Fischer test when one of the numbers was less than five. For continuous variables, results are presented as median (Interquartile Range) [Confidence Interval 95 of the median] and compared by a Wilcoxon test, after verification of the normality with a Shapiro-Wilk test. All tests were two-sided. The types of all variables, categorical or continuous, are summarised in a Supplementary Table.

P values of less than 0.05 were considered significant. Bonferroni correction was used to correct p values of the comparison between groups of the Intubation Difficulty Scale and of its parameters.

The statistics were generated using SAS 9.4 software.

### *Data sharing*

Dataset is available from the Dryad repository (DOI: 10.5061/dryad.280gb5mp6).

## Results

Patients were recruited between the 29<sup>th</sup> November 2016 and the 1<sup>st</sup> April 2019. Of 300 included patients, 271 were randomised and 256 analysed with 123 patients in the No-Video group and 133 in the Video group (**Figure 1**).

Baseline features were well balanced between groups (**Table 1**).

Requirement for assistance was not decreased in the Video group (36.1% [95% CI 27.9-44.9] versus 45.5% [95%CI 36.5-54.7] in the No-Video group,  $p=0.74$  after Bonferroni correction; Odds Ratio: 0.7 [0.4-1.1] and Absolute Risk: 0.10 [-0.03-0.22] (**Table 2**). Requirement for assistance was similar between groups when considering each centre separately ( $p=0.99$ ).

The Intubation Difficulty Scale was similar between groups ( $p=0.05$ ; Table 2); its parameters are presented in Table 3.

Glottis visualization was significantly better in the Video group with a lower Cormack and Lehane score ( $p<0.001$ ), and higher percentage of glottic opening score ( $p<0.001$ ). There was no difference between groups considering other outcomes, in particular for duration of intubation, number of attempts, use of complementary techniques (BURP and railroading), except for ease of intubation, better in the Video group ( $p=0.001$ ), and for requirement of an abnormal traction force, lower in the Video group ( $p=0.007$ ). The opaque cover was withdrawn in 7.3% of the cases in the No-Video group (**Tables 2 and 3**).

Bispectral index increased after intubation only in the Video group ( $p=0.04$ ). Heart rate and mean arterial pressure increased in both groups after intubation with a smaller increase in mean arterial pressure in the Video group ( $p=0.04$ ) (**Table 4**).

Communication and behaviour within the anaesthesia team was appropriate in all cases (values of 3).

Oxygen desaturation, hypotension or hypertension requiring treatment during the intubation period

1  
2  
3 and postoperative complications (hoarseness or sore throat) were observed similarly in both groups  
4

5 **(Table 5).**  
6

7 No serious adverse event occurred.  
8  
9  
10  
11  
12  
13  
14  
15  
16  
17  
18  
19  
20  
21  
22  
23  
24  
25  
26  
27  
28  
29  
30  
31  
32  
33  
34  
35  
36  
37  
38  
39  
40  
41  
42  
43  
44  
45  
46  
47  
48  
49  
50  
51  
52  
53  
54  
55  
56  
57  
58  
59  
60

For peer review only

## Discussion

In this Video-No Video trial performed in surgical patients without particular risk of difficulty in airway management, videolaryngoscopy did not decrease the requirement for assistance to perform intubation.

This result corroborates studies which consider that the use of a videolaryngoscope is of little interest in the management of such patients. Advantages of videolaryngoscopy seem to be secondary, especially better glottic visualization<sup>7</sup> which does not translate directly into a higher success rate on the first attempt.<sup>7,21</sup>

There is no universal rule regarding anaesthetic staffing neither for qualifications, anaesthesiologists, or registered nurse anaesthetists nor for the required number during the whole procedure or during the induction-intubation sequence. In our study, patients received care during the induction and intubation periods from an anaesthesiologist and a nurse anaesthetist as is usual in the hospitals where the protocol takes place. This probably explains the high percentage of recourse to a second person since he or she is available without delay. Such incidence is not reported per se in studies contrary to the use of alternative techniques. Except for cases where tracheal intubation is easy, help is needed to perform a BURP manoeuvre or give a gum elastic bougie or a stylet for example.

Interestingly, Jones *et al.* studied the impact of the use the C-MAC videolaryngoscope (Karl Storz Endoscopy, Slough, Berkshire, UK) on nurse anaesthetist working practices and training which has not previously been reported.<sup>22</sup> Most respondents claimed that the videolaryngoscope improved team work with the anaesthesiologist and allow anticipation of the required alternative technique by observing the view at laryngoscopy on a screen. Laryngoscopy is thus moving from an individual process to a shared procedure. Therefore, it is better to use a screen separate from the videolaryngoscope. The participation of the nurse facilitated by the glottic visualization is particularly



1  
2  
3 valuable when he or she performs a BURP to quickly find the most efficient gesture avoiding also a  
4  
5 worsening of the glottic visualization.<sup>23</sup>  
6  
7  
8  
9

10 Alternative techniques were used at a similar incidence in both groups, mainly the backward, upward,  
11 and rightward pressure (BURP) in around 40% of the patients and the use of a gum elastic bougie  
12 (railroading technique) in around 10% of the patients. Such incidence of use of BURP is not surprising  
13 in that incidences of 23%<sup>20</sup> and 36%<sup>24</sup> have been reported previously. High incidence of their use is  
14 probably explained by the fear of dental breakage, with an incidence up to 0.2% of all general  
15 anaesthesia procedures, is responsible for 40% of the complaints against anaesthesiologists in  
16 France.<sup>25</sup>  
17  
18  
19  
20  
21  
22  
23  
24

25 The BURP manoeuvre improves laryngoscopic visualization more easily than simple back pressure on the  
26 larynx<sup>26</sup> and limits the forces exerted during laryngoscopy.<sup>27,28</sup> However, the best condition is represented  
27 when the assistant can view the laryngeal view in real time on a remote screen during intubation to adapt  
28 the BURP to have the best glottic view.<sup>29</sup> The McGrath MAC videolaryngoscope has not this possibility  
29 contrary to other videolaryngoscopes which have the possibility to have a remote screen and thus be  
30 accessible to all participants (Airtraq®, Glidescope®, and King Vision® for example). This is important because  
31 poor BURP practice is counterproductive and aggravates glottic vision.<sup>30</sup> The secondly alternative technique  
32 used is tube rail-roading over a gum elastic bougie.<sup>31</sup> This technique of choice when BURP does not align  
33 the oral, pharyngeal and laryngeal axes is more complex since it requires good coordination between the  
34 members of the team.  
35  
36  
37  
38  
39  
40  
41  
42  
43  
44  
45  
46

47 It should also be noted that the anaesthesiologist chose to remove the screen cover to benefit from  
48 the video function of the videolaryngoscope in 7% of the cases.  
49  
50

51 Finally, complications noticed during the induction-intubation sequence and after it up to the next day  
52 were similar in both groups. Contrary to others who used a Glide Scope, we did not find that the use  
53 of a videolaryngoscope decreased the incidence and severity of sore throat and hoarseness after  
54 tracheal intubation.<sup>32</sup>  
55  
56  
57  
58  
59  
60

1  
2  
3 The strengths of the study come from the usual practice of the centres which were used, including  
4 especially the staffing ratio with one anaesthesiologist and one nurse anaesthetist (1 to 1) in each case.  
5  
6 But this permanent presence of a two-person team may have induced a bias because it facilitates the  
7  
8 practice of an alternative technique. Another strength is the use of the same laryngoscope in both groups,  
9  
10 the only difference being the use or not of the video screen. The last strength is that the present study is  
11  
12 the first single blinded study since most of the criteria of judgment, in particular the main criterion, are  
13  
14 obtained from a video recording of the intubation sequence without the possibility for the evaluator to  
15  
16 know if the video function of the McGrath MAC videolaryngoscope was used.  
17  
18

19  
20 One weakness comes from the choice of the McGrath MAC videolaryngoscope. We chose this device  
21  
22 since it requires limited training because of its similarity to the Macintosh laryngoscope with especially  
23  
24 a similar blade, a small size, and a low cost. Consequently, our results could be valid for other  
25  
26 videolaryngoscopes having a blade-shape like the Macintosh laryngoscope (C-MAC or APA for  
27  
28 example), but not acutely angled videolaryngoscopes (McGrath and GlideScope for example) or with  
29  
30 an integrated channel videolaryngoscope (KingVision, AWS-S200, and Airtraq). Another point  
31  
32 explaining why generalization is not possible is that our procedure includes the simultaneous presence  
33  
34 of an anaesthesiologist, and a nurse anaesthetist as is the rule in the health care institutions that  
35  
36 participated in the study, but this practice is far from being the rule. In these institutions,  
37  
38 anaesthesiologists and nurse anaesthetists have an identical practice when intubation concerns  
39  
40 patients with no particular risk of access to the airways. Other weakness are the risk of 7%  
41  
42 misclassification when using the Arné score to predict difficult intubation<sup>11</sup> and the large number of  
43  
44 patients who were not seen the day after the operation, which makes the postoperative data very  
45  
46 questionable. Another major point is that we used the need for assistance from a member of the  
47  
48 anaesthetic team as the primary outcome. This choice is not usual, but it seemed to us more interesting  
49  
50 than the time to successful tracheal intubation or the number of attempts, outcomes that have little  
51  
52 interest in a population without risk of difficult intubation. On the other hand, we felt it was important  
53  
54 to evaluate the possible benefit of a new technology on the ergonomics of the work of  
55  
56  
57  
58  
59  
60

1  
2  
3 anaesthesiologists. However, one of the limitations of our primary outcome is its personal nature and  
4  
5 we could have been more specific in the need for assistance and possibly create a score combining for  
6  
7 example force exerted and POGO. We sought to have this primary outcome assessed blind to the  
8  
9 randomisation arm. As noted, the person recording the video sequence was positioned at the foot of  
10  
11 the patient, making it impossible to see if there was an opaque cover on the videolaryngoscope screen.  
12  
13 It is possible, however, that the persons who was watching the video could see, or thought they could  
14  
15 see, if the video function was being used. Finally, eight patients were missing in the video-group since  
16  
17 the calculation of the number to be included resulted in a minimum number of 131 patients in each  
18  
19 group. However, it is highly unlikely that this would change the results significantly.  
20  
21  
22  
23  
24  
25  
26  
27  
28  
29  
30  
31  
32  
33  
34  
35  
36  
37  
38  
39  
40  
41  
42  
43  
44  
45  
46  
47  
48  
49  
50  
51  
52  
53  
54  
55  
56  
57  
58  
59  
60

For peer review only

## Conclusion

The Difficult Airway Society (DAS) guidelines for unanticipated difficult intubation recommend that all anaesthesiologists are trained to use a videolaryngoscope and that they have immediate access to one<sup>5</sup> and several authors have called for videolaryngoscopes to be used for all intubations.<sup>9</sup> One would have expected that the use of a videolaryngoscope, i.e. the introduction of a new technology, would have changed the practice of intubation. In patients at low risk of intubation difficulty, the expected benefit should have been greater autonomy for the person performing the procedure. Our results do not confirm this hypothesis.

## **Acknowledgements relating to this article**

Assistance with the study: We would like to thank Polly GOBIN and by American Journal Experts for their linguistic help.

Funding: This research received no specific grant from any funding agency in the public, commercial or not-for-profit sectors

Conflicts of interest: None.

Presentation: None.

## **Authors contribution**

OB, XP, JMD, MF and MLG have contribute substantially to conception and design of the study.

OB, ZC, JO, LAT, XP, SM, MLG have contribute substantially to acquisition of data.

All authors have participated to the analysis and interpretation of data.

TK performed the statistical analysis.

MF has written the first draft.

MF has taken responsibility for the integrity of the work as a whole, from inception to published article.

All authors have revised it critically for important intellectual content.

All authors approve the final version.

**REFERENCES**

1. Caplan RA, Posner KL, Ward RJ, Cheney FW. Adverse respiratory events in anesthesia: a closed claims analysis. *Anesthesiology* 1990; 72:828-33.
2. Lienhart A, Auroy Y, Pequignot F *et al.* Survey of anesthesia-related mortality in France. *Anesthesiology* 2006; 105:1087-97.
3. Cook TM, Scott S, Mihai R. Litigation related to airway and respiratory complications of anaesthesia: an analysis of claims against the NHS in England 1995-2007. *Anaesthesia* 2010; 65:556-63.
4. Apfelbaum JL, Hagberg CA, Caplan RA *et al.* Practice guidelines for management of the difficult airway: an updated report by the American Society of Anesthesiologists Task Force on Management of the Difficult Airway. *Anesthesiology* 2013; 118:251-70.
5. Frerk C, Mitchell VS, McNarry AF *et al.* Difficult Airway Society 2015 guidelines for management of unanticipated difficult intubation in adults. *Br J Anaesth* 2015; 115:827-48.
6. Pieters BMA, Maas EHA, Knape JTA, van Zundert AAJ. Videolaryngoscopy vs. direct laryngoscopy use by experienced anaesthetists in patients with known difficult airways: a systematic review and meta-analysis. *Anaesthesia* 2017; 72:1532-41.
7. Lewis SR, Butler AR, Parker J, Cook TM, Schofield-Robinson OJ, Smith AF. Videolaryngoscopy versus direct laryngoscopy for adult patients requiring tracheal intubation: a Cochrane Systematic Review. *Br J Anaesth* 2017; 119:369-83.
8. Xue FS, Liu GP, Sun C. Videolaryngoscope as a standard intubation device. *Br J Anaesth* 2015; 115:137-8.
9. Zaouter C, Calderon J, Hemmerling TM. Videolaryngoscopy as a new standard of care. *Br J Anaesth* 2015; 114:181-3.
10. Cook TM, Boniface NJ, Seller C *et al.* Universal videolaryngoscopy: a structured approach to conversion to videolaryngoscopy for all intubations in an anaesthetic and intensive care department. *Br J Anaesth* 2018; 120:173-80.

- 1  
2  
3 11. Arne J, Descoins P, Fusciardi J *et al*. Preoperative assessment for difficult intubation in general and ENT  
4 surgery: predictive value of a clinical multivariate risk index. *Br J Anaesth* 1998; 80:140-6.  
5  
6
- 7 12. Savoldelli GL, Schiffer E, Abegg C, *et al*. Learning curves of the Glidescope, the McGrath and the  
8 Airtraq laryngoscopes: a manikin study. *Eur J Anaesthesiol* 2009;26:554-8.  
9
- 10 13. Langeron O, Bourgain JL, Laccoureye O, Legras A, Orliaguet G. [Difficult airway algorithms and  
11 management]. *Ann Fr Anesth Reanim* 2008; 27:41-5.  
12
- 13 14. Cormack RS. Cormack-Lehane classification revisited. *Br J Anaesth* 2010; 105:867-8.  
14
- 15 15. Levitan RM, Ochroch EA, Kush S, Shofer FS, Hollander JE. Assessment of airway visualization:  
16 validation of the percentage of glottic opening (POGO) scale. *Acad Emerg Med* 1998; 5:919-23.  
17
- 18 16. Adnet F, Borron SW, Racine SX *et al*. The intubation difficulty scale (IDS): proposal and evaluation of a  
19 new score characterizing the complexity of endotracheal intubation. *Anesthesiology* 1997; 87:1290-7.  
20
- 21 17. Kraus MW, Huang C, Keltner D. Tactile communication, cooperation, and performance: an  
22 ethological study of the NBA. *Emotion* 2010; 10:745-9.  
23
- 24 18. Stout DM, Bishop MJ, Dwersteg JF, Cullen BF. Correlation of endotracheal tube size with sore  
25 throat and hoarseness following general anesthesia. *Anesthesiology* 1987; 67:419-21.  
26
- 27 19. Capan LM, Bruce DL, Patel KP, Turndorf H. Succinylcholine-induced postoperative sore throat.  
28 *Anesthesiology* 1983; 59:202-6.  
29
- 30 20. Adnet F, Racine SX, Borron SW *et al*. A survey of tracheal intubation difficulty in the operating  
31 room: a prospective observational study. *Acta Anaesthesiol Scand* 2001; 45:327-2.  
32
- 33 21. Hoshijima H, Mihara T, Maruyama K *et al*. McGrath videolaryngoscope versus Macintosh  
34 laryngoscope for tracheal intubation: A systematic review and meta-analysis with trial sequential  
35 analysis. *J Clin Anesth* 2018; 46:25-32.  
36
- 37 22. Jones L, Mulcahy K, Fox J, Cook TM, Kelly FE. C-MAC((c)) videolaryngoscopy: The anaesthetic  
38 assistant's view. *J Perioper Pract* 2018; 28:83-9.  
39
- 40 23. Cook TM. The cricoid debate - balancing risks and benefits. *Anaesthesia* 2016; 71:721-2.  
41  
42  
43  
44  
45  
46  
47  
48  
49  
50  
51  
52  
53  
54  
55  
56  
57  
58  
59  
60

- 1  
2  
3 24. Akhtar M, Ali Z, Hassan N, Mehdi S, Wani GM, Mir AH. A randomized study comparing the sniffing  
4 position with simple head extension for glottis visualization and difficulty in intubation during direct  
5 laryngoscopy. *Anesthesia, Essays and Researches* 2017; 11:762-6.  
6  
7  
8  
9  
10 25. Nouette-Gaulain K, Lenfant F, Jacquet-Francillon D *et al.* [French clinical guidelines for prevention  
11 of perianaesthetic dental injuries: long text]. *Ann Fr Anesth Reanim* 2012; 31:213-23.  
12  
13  
14 26. Takahata O, Kubota M, Mamiya K *et al.* The efficacy of the "BURP" maneuver during a difficult  
15 laryngoscopy. *Anesth Analg* 1997; 84:419-21.  
16  
17  
18  
19 27. Bishop MJ, Harrington RM, Tencer AF. Force applied during tracheal intubation. *Anesth Analg*  
20 1992; 74:411-4.  
21  
22  
23  
24 28. Bucx MJ, van der Vegt MH, Sniijders CJ, Stijnen T, Wesselink PR. Transverse forces exerted on the  
25 maxillary incisors during laryngoscopy. *Can J Anaesth* 1996; 43:665-71.  
26  
27  
28 29. Loughnan TE, Gunasekera E, Tan TP. Improving the C-MAC video laryngoscopic view when  
29 applying cricoid pressure by allowing access of assistant to the video screen. *Anaesth Intensive Care*  
30 2012; 40:128-30.  
31  
32  
33  
34 30. Snider DD, Clarke D, Finucane BT. The "BURP" maneuver worsens the glottic view when applied  
35 in combination with cricoid pressure. *Can J Anaesth* 2005; 52:100-4.  
36  
37  
38  
39 31. Macintosh RR. An aid to oral intubation. *BMJ* 1949; 1:28.  
40  
41  
42 32. Najafi A, Imani F, Makarem J *et al.* Postoperative sore throat after laryngoscopy with macintosh or  
43 glide scope video laryngoscope blade in normal airway patients. *Anesth Pain Med* 2014; 4:e15136.  
44  
45  
46  
47  
48  
49  
50  
51  
52  
53  
54  
55  
56  
57  
58  
59  
60



1  
2  
3 **Legend of Figure 1**  
4

5 Flow chart  
6

7  
8 No-Video Group: intubation was performed using a McGrath Mac videolaryngoscope with its screen  
9  
10 deactivated

11  
12 Video group: intubation was performed using a McGrath Mac videolaryngoscope with its screen  
13  
14 activated

15  
16 No VR: No video recording  
17  
18  
19  
20  
21  
22

23 **Supplementary Table**  
24

25  
26 Outcomes (type of variable and timeline of measurements)  
27  
28  
29  
30  
31  
32  
33  
34  
35  
36  
37  
38  
39  
40  
41  
42  
43  
44  
45  
46  
47  
48  
49  
50  
51  
52  
53  
54  
55  
56  
57  
58  
59  
60

For peer review only

Table 1. Patient characteristics

|                                                                      | Video group<br>(n=133)      | No-Video group<br>(n=123)   |
|----------------------------------------------------------------------|-----------------------------|-----------------------------|
| Male patients, number (%) [95% CI of %]                              | 61 (45.9)<br>[37.2 - 54.7]  | 58 (47.1)<br>[38.3 - 56.4]  |
| Age, years, median (IQR) [95% CI of median]                          | 58 (23)<br>[54 - 62]        | 60 (26)<br>[52 - 64]        |
| Body mass index, kg/m <sup>2</sup> , median (IQR) [95% CI of median] | 25.1 (6.3)<br>[24.2 - 26.1] | 24.7 (5.8)<br>[23.7 - 25.4] |
| Arné score <sup>11</sup> , number (%) [95% CI of %]                  | 2 (5)<br>[2 - 3]            | 2 (4)<br>[2 - 2]            |
| Previous knowledge of difficult intubation                           | 1 (0.8)<br>[0.0 - 4.1]      | 1 (0.8)<br>[0.0 - 4.4]      |
| Pathologies associated with difficult intubation                     | 1 (0.8)<br>[0.0 - 4.1]      | 0                           |
| Clinical symptoms of airway pathology                                | 6 (4.5)<br>[1.7 - 9.6]      | 6 (4.9)<br>[1.8 - 10.3]     |
| Interincisor gap (<25 mm) and limited mandible luxation              | 0                           | 0                           |
| Thyromental distance < 65 mm                                         | 4 (3.0)<br>[0.8 - 7.5]      | 2 (1.6)<br>[0.2 - 5.7]      |
| Maximum range of head and neck movement ≤ 80°                        | 4 (3.0)<br>[0.8 - 7.5]      | 1 (0.8)<br>[0.0 - 4.4]      |
| Mallampati score                                                     |                             |                             |
| 1                                                                    | 71 (53.4)<br>[44.5 - 62.1]  | 69 (56.1)<br>[46.9 - 65.0]  |
| 2                                                                    | 51 (38.3)<br>[30.0 - 47.2]  | 42 (34.1)<br>[25.8 - 43.2]  |
| 3                                                                    | 10 (7.5)<br>[3.7 - 13.4]    | 12 (9.7)<br>[5.1 - 16.4]    |
| 4                                                                    | 1 (0.8)<br>[0.0 - 4.1]      | 0                           |

Table 2. Intubation variables (final values)

|                                                                                                               | Video group<br>(n=133)  | No-Video group (n=123)  | P value |
|---------------------------------------------------------------------------------------------------------------|-------------------------|-------------------------|---------|
| Required assistance by the additional person, yes, number (%) [95% CI of %]                                   | 48 (36.1) [27.9 - 44.9] | 56 (45.5) [36.5 --54.7] | 0.74*   |
| Intubation Difficulty Scale (IDS), classes, number (%) [95% CI of %]                                          |                         |                         | 0.05*   |
| IDS = 0                                                                                                       | 77 (57.9) [49.0 - 66.4] | 50 (40.6) [31.9 - 49.9] |         |
| 0 < IDS ≤ 5                                                                                                   | 55 (41.3) [32.9 - 50.2] | 68 (55.3) [46.1 - 64.2] |         |
| > 5                                                                                                           | 1 (0.8) [0.0 - 4.1]     | 5 (4.1) [1.3 - 9.2]     |         |
| Railroading the tube over a gum elastic bougie, yes, number (%) [95% CI of %]                                 | 16 (12.0)[7.0 - 18.8]   | 13 (10.6) [5.7 - 17.4]  | 0.71    |
| Percentage of glottic opening score, median (IQR) [95% CI of median]                                          | 100 (10) [100 - 100]    | 80 (40) [80 - 90]       | <0.001  |
| Oesophageal Intubation, yes, number (%) [95% CI of %]                                                         | 4 (3.1) [0.8 - 7.5]     | 2 (1.6) [0.2 - 5.7]     | 0.68    |
| BURP, yes, number (%) [95% CI of %]                                                                           | 46 (34.6)[26.6 - 43.3]  | 53 (43.1) [34.2 - 52.3] | 0.16    |
| Removing the cover, yes, number (%) [95% CI of %]                                                             |                         | 9 (7.3) [2.7 - 11.9]    |         |
| Time between the introduction of the McGrath and the third capnogram, sec,<br>median (IQR) [95% CI of median] | 50 (31) [46 - 57] {113} | 49 (31) [42 - 53] {104} | 0.13    |
| Ease of intubation, 0 (very easy) - 10 (very difficult), median (IQR) [95% CI of<br>median]                   | 0 (2) [0 - 0]           | 2 (4) [1 - 2]           | <0.001  |

In cases in which the data are incomplete, the number of available data points is indicated between curly brackets {}

\* P value with Bonferroni correction

Table 3. Parameters of the Intubation Difficulty Scale, (final values)

|                                                                             | Video group (n=133)      | No-Video group (n=123)  | P value*     |
|-----------------------------------------------------------------------------|--------------------------|-------------------------|--------------|
| Number of attempts, classes, number (%) [95% CI of %]                       |                          |                         | 0.99         |
| 1                                                                           | 122 (91.7) [87.0 - 96.4] | 112 (91.1)[86.0 - 96.1] |              |
| 2                                                                           | 10 (7.5)[3.0 - 12.0]     | 6 (4.9)[1.1 - 8.7]      |              |
| 3                                                                           | 1 (0.8)[0.0 - 2.2]       | 4 (3.2)[0.1 - 6.4]      |              |
| 4                                                                           | 0 (0.0)[0.0 - 0.0]       | 1 (0.8)[0.0 - 2.4]      |              |
| Required assistance by the additional person, yes, number (%) [95% CI of %] | 48 (36.1) [27.9 - 44.9]  | 56 (45.5) [36.5 - 54.7] | 0.74         |
| Number of alternatives techniques, number (%) [95% CI of %]                 |                          |                         | 0.99         |
| None                                                                        | 85 (63.9) [55.7 - 72.1]  | 69 (56.1) [47.3 - 64.8] |              |
| 1                                                                           | 34 (25.6) [18.1 - 33.0]  | 42 (34.1) [25.8 - 42.6] |              |
| 2                                                                           | 14 (10.5) [5.3 - 15.7]   | 12 (9.8) [4.5 - 15.0]   |              |
| Cormack and Lehane grade, number (%) [95% CI of %]                          |                          |                         | <b>0.001</b> |
| 1                                                                           | 111 (83.5) [76.0 - 89.3] | 63 (51.2) [42.0 - 60.3] |              |
| 2a                                                                          | 19 (14.3) [8.8 - 21.4]   | 33 (26.8) [19.2 - 35.6] |              |
| 2b                                                                          | 1 (0.8) [0.0 - 4.1]      | 18 (14.6) [8.9 - 22.1]  |              |
| 3                                                                           | 2 (1.5) [0.2 - 5.3]      | 9 (7.3) [3.4 - 13.4]    |              |
| Abnormal traction force, yes, number (%) [95% CI of %]                      | 13 (9.8) [5.3 - 16.1]    | 27 (21.9) [15.0 - 30.3] | <b>0.04</b>  |
| Vocal cord position, abduction, yes, number (%) [95% CI of %]               | 133 (100) [100 - 100]    | 123 (100) [100 - 100]   | NA           |

In cases in which the data are incomplete, the number of available data points is indicated between curly brackets {}.

\*: P values were calculated using Bonferroni correction

Table 4. Bispectral index, heart rate and arterial pressure measurements (change from baseline and from preintubation period)

|                                               | Group             | Before induction | Before intubation | After intubation | Difference<br>between before<br>and after<br>intubation | Before<br>intubation<br>vs.<br>after intubation | Video<br>vs.<br>No-Video<br>group<br><br>P-value |
|-----------------------------------------------|-------------------|------------------|-------------------|------------------|---------------------------------------------------------|-------------------------------------------------|--------------------------------------------------|
| BIS, number (%)                               | Video group       | 94 (8)           | 40 (19)           | 44 (18)          | 2 (15)                                                  | 0.11                                            | 0.20                                             |
| [95% CI of %]                                 |                   | [93 – 97] {74}   | [37 – 45] {88}    | [40 – 47] {102}  | (0 – 5) {85}                                            |                                                 |                                                  |
|                                               | No-Video<br>group | 96 (6)           | 46 (21)           | 50 (17)          | 5 (17)                                                  | <b>0.04</b>                                     |                                                  |
|                                               |                   | [94 – 97] {75}   | (42 – 48) {84}    | [46 – 53] {89}   | (2 – 9) {79}                                            |                                                 |                                                  |
| HR, beats/min,<br>number (%) [95%<br>CI of %] | Video group       | 74 (20)          | 67 (16)           | 79 (27)          | 9 (17)                                                  | <b>&lt;0.001</b>                                | 0.103                                            |
|                                               |                   | [71 - 78] {129}  | [63 - 70] {130}   | [75 - 82] {131}  | (7 - 14) {129}                                          |                                                 |                                                  |
|                                               | No-Video<br>group | 72 (22)          | 65 (16)           | 83 (23)          | 13 (19)                                                 | <b>&lt;0.001</b>                                |                                                  |
|                                               |                   | [68 - 76] {115}  | [61 - 69] {121}   | [78 - 86] {121}  | (10 - 19) {120}                                         |                                                 |                                                  |
| MAP, mmHg,<br>number (%) [95%<br>CI of %]     | Video group       | 98 (20)          | 74 (24)           | 82 (28)          | 4 (25)                                                  | <b>0.007</b>                                    | <b>0.04</b>                                      |
|                                               |                   | [93 - 100] {128} | [72 - 81] {125}   | [78 - 87] {125}  | (0 - 7) {121}                                           |                                                 |                                                  |
|                                               | No-Video<br>group | 99 (22)          | 77 (22)           | 87 (41)          | 12 (39)                                                 | <b>&lt;0.001</b>                                |                                                  |
|                                               |                   | [97 - 104] {114} | (74 - 84) {118}   | [82 - 93] {113}  | (5 - 20) {110}                                          |                                                 |                                                  |

The results are presented as median (interquartile range) [95% CI of the median]. Number of available data points is indicated between curly brackets {}.

BIS = Bispectral index, HR = heart rate (beats per minute), PAM = mean blood pressure (mmHg)

Table 5. Intra- and postoperative complications

|                                                                                    | Video group<br>(n=133)     | No-Video group<br>(n=123)  | P value |
|------------------------------------------------------------------------------------|----------------------------|----------------------------|---------|
| <b>Intraoperative complications</b>                                                |                            |                            |         |
| Oxygen desaturation (peripheral oxygen saturation < 92%), number (%) [95% CI of %] | 2 (1.5)<br>[0.2 - 5.3]     | 0                          | 0.50    |
| Hypotension having required treatment, number (%) [95% CI of %]                    | 4 (3.0)<br>[0.1 - 5.9]     | 3 (2.4)<br>[0.0 - 5.2]     | 0.99    |
| Hypertension having required treatment, number (%) [95% CI of %]                   | 0 (0.0)<br>[0.0 - 0.0]     | 1 (0.0)<br>[0.0 - 2.4]     | 0.48    |
| Dental injury, number (%) [95% CI of %]                                            | 0                          | 0                          |         |
| <b>Postoperative complications</b>                                                 |                            |                            |         |
| Hoarseness, number (%) [95% CI of %]                                               | {n=34}                     | {n=37}                     | 0.99    |
| Grade 1                                                                            | 23 (68)<br>[49.5 - 82.6]   | 25 (68)<br>[50.2 - 82.0]   |         |
| Grade 2                                                                            | 11 (32)<br>[17.4 - 50.5]   | 12 (32)<br>[18.0 - 49.8]   |         |
| Grade 3                                                                            | 0                          | 0                          |         |
| Sore throat, number (%) [95% CI of %]                                              | {n=42}                     | {n=33}                     | 0.41    |
| Grade 1                                                                            | 33 (78.6)<br>[63.2 - 89.7] | 23 (69.7)<br>[51.3 - 84.4] |         |
| Grade 2                                                                            | 8 (19.0)<br>[8.6 - 34.1]   | 10 (30.3)<br>[15.6 - 48.7] |         |
| Grade 3                                                                            | 1 (2.4)<br>[0.1 - 12.6]    | 0                          |         |

When the data were incomplete, the number of available data points is indicated between curly brackets {}.

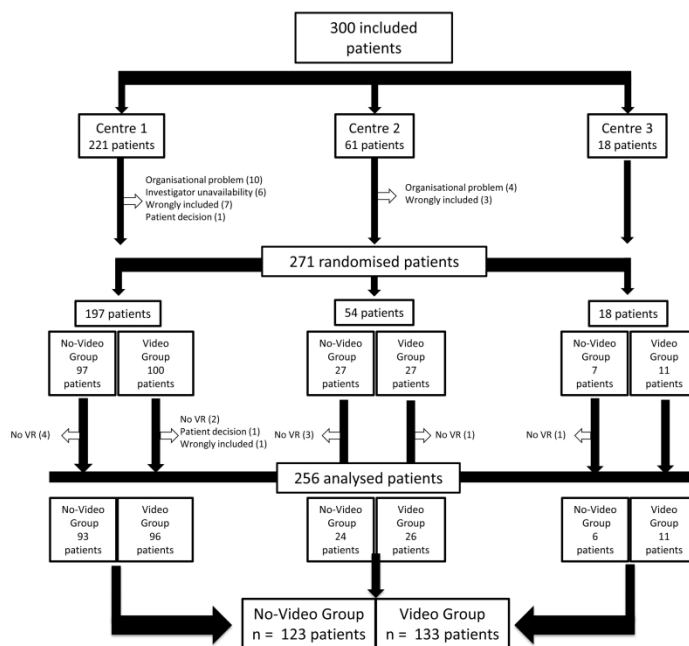

Figure 1

Figure 1

297x209mm (300 x 300 DPI)

Supplementary Table. Outcomes (type of variable and timeline of measurements)

|                                                                               | Type of variable | Timeline of the measurement |
|-------------------------------------------------------------------------------|------------------|-----------------------------|
| Primary outcome                                                               |                  |                             |
| Required assistance by the additional person, yes                             | Categorical      | Off line                    |
| Secondary outcomes                                                            |                  |                             |
| Intubation                                                                    |                  |                             |
| Intubation Difficulty Scale, three classes                                    | Categorical      |                             |
| Number of attempts, four classes                                              | Categorical      | Off line                    |
| Number of operators, one/two                                                  | Categorical      | Off line                    |
| Number of alternative techniques, none/one/two                                | Categorical      | Off line                    |
| Cormack and Lehane grade, four classes                                        | Categorical      | On line                     |
| Abnormal traction force, yes                                                  | Categorical      | On line                     |
| BURP, yes                                                                     | Categorical      | Off line                    |
| Vocal cord position (abduction), yes                                          | Categorical      | On line                     |
| Railroading the tube over a gum elastic bougie, yes                           | Categorical      | Off line                    |
| Percentage of glottic opening score                                           | Continuous       | On line                     |
| Oesophageal Intubation, yes                                                   | Categorical      | On line                     |
| Removing the cover, yes                                                       | Categorical      | Off line                    |
| Time between the introduction of the McGrath and the third capnogram, seconds | Continuous       | Off line                    |
| Ease of intubation, 0 (very easy) to 10 (very difficult),                     | Continuous       | On line                     |
| BIS and haemodynamic variables                                                |                  |                             |
| BIS, absolute values,                                                         | Continuous       | On line                     |
| Heart rate and arterial pressure, absolute values,                            | Continuous       | On line                     |
| Intraoperative complications                                                  |                  |                             |
| Oxygen desaturation (peripheral oxygen saturation < 92%), yes                 | Categorical      | On line                     |
| Hypotension having required treatment, yes                                    | Categorical      | On line                     |
| Hypertension having required treatment, yes                                   | Categorical      | On line                     |
| Dental injury, yes                                                            | Categorical      | On line                     |
| Postoperative complications                                                   |                  |                             |
| Hoarseness, three grades                                                      | Categorical      | Day1                        |
| Sore throat, three grades                                                     | Categorical      | Day1                        |
| Serious adverse event, yes                                                    | Categorical      | Day1                        |

On line: variable recorded during the procedure

Off line: variable recorded a posteriori from the lecture of the video of the intubation sequence

Day1: postoperative visit at day1



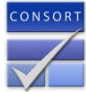

## CONSORT 2010 checklist of information to include when reporting a randomised trial\*

| Section/Topic                    | Item No | Checklist item                                                                                                                                                                              | Reported on page No |
|----------------------------------|---------|---------------------------------------------------------------------------------------------------------------------------------------------------------------------------------------------|---------------------|
| <b>Title and abstract</b>        |         |                                                                                                                                                                                             |                     |
|                                  | 1a      | Identification as a randomised trial in the title                                                                                                                                           | 2/56                |
|                                  | 1b      | Structured summary of trial design, methods, results, and conclusions (for specific guidance see CONSORT for abstracts)                                                                     | 3/56                |
| <b>Introduction</b>              |         |                                                                                                                                                                                             |                     |
| Background and objectives        | 2a      | Scientific background and explanation of rationale                                                                                                                                          | 6/56                |
|                                  | 2b      | Specific objectives or hypotheses                                                                                                                                                           | 6/56                |
| <b>Methods</b>                   |         |                                                                                                                                                                                             |                     |
| Trial design                     | 3a      | Description of trial design (such as parallel, factorial) including allocation ratio                                                                                                        | 7/56                |
|                                  | 3b      | Important changes to methods after trial commencement (such as eligibility criteria), with reasons                                                                                          | NA                  |
| Participants                     | 4a      | Eligibility criteria for participants                                                                                                                                                       | 7/56                |
|                                  | 4b      | Settings and locations where the data were collected                                                                                                                                        | 7/56                |
| Interventions                    | 5       | The interventions for each group with sufficient details to allow replication, including how and when they were actually administered                                                       | 8/56                |
| Outcomes                         | 6a      | Completely defined pre-specified primary and secondary outcome measures, including how and when they were assessed                                                                          | 10/56               |
|                                  | 6b      | Any changes to trial outcomes after the trial commenced, with reasons                                                                                                                       | NA                  |
| Sample size                      | 7a      | How sample size was determined                                                                                                                                                              | 11/56               |
|                                  | 7b      | When applicable, explanation of any interim analyses and stopping guidelines                                                                                                                | NA                  |
| <b>Randomisation:</b>            |         |                                                                                                                                                                                             |                     |
| Sequence generation              | 8a      | Method used to generate the random allocation sequence                                                                                                                                      | 8/56                |
|                                  | 8b      | Type of randomisation; details of any restriction (such as blocking and block size)                                                                                                         | 8/56                |
| Allocation concealment mechanism | 9       | Mechanism used to implement the random allocation sequence (such as sequentially numbered containers), describing any steps taken to conceal the sequence until interventions were assigned | 8/56                |
| Implementation                   | 10      | Who generated the random allocation sequence, who enrolled participants, and who assigned participants to interventions                                                                     | 8/56                |
| Blinding                         | 11a     | If done, who was blinded after assignment to interventions (for example, participants, care providers, those                                                                                | 10/56               |

|    |                          |                                                             |                                                                                                                  |
|----|--------------------------|-------------------------------------------------------------|------------------------------------------------------------------------------------------------------------------|
| 1  |                          | assessing outcomes) and how                                 |                                                                                                                  |
| 2  | 11b                      | If relevant, description of the similarity of interventions | NA                                                                                                               |
| 3  | Statistical methods      | 12a                                                         | Statistical methods used to compare groups for primary and secondary outcomes                                    |
| 4  |                          | 12b                                                         | Methods for additional analyses, such as subgroup analyses and adjusted analyses                                 |
| 5  |                          |                                                             | NA                                                                                                               |
| 6  | <b>Results</b>           |                                                             |                                                                                                                  |
| 7  | Participant flow (a      | 13a                                                         | For each group, the numbers of participants who were randomly assigned, received intended treatment, and         |
| 8  | diagram is strongly      |                                                             | were analysed for the primary outcome                                                                            |
| 9  | recommended)             | 13b                                                         | For each group, losses and exclusions after randomisation, together with reasons                                 |
| 10 | Recruitment              | 14a                                                         | Dates defining the periods of recruitment and follow-up                                                          |
| 11 |                          | 14b                                                         | Why the trial ended or was stopped                                                                               |
| 12 | Baseline data            | 15                                                          | A table showing baseline demographic and clinical characteristics for each group                                 |
| 13 | Numbers analysed         | 16                                                          | For each group, number of participants (denominator) included in each analysis and whether the analysis was      |
| 14 |                          |                                                             | by original assigned groups                                                                                      |
| 15 | Outcomes and             | 17a                                                         | For each primary and secondary outcome, results for each group, and the estimated effect size and its            |
| 16 | estimation               |                                                             | precision (such as 95% confidence interval)                                                                      |
| 17 |                          | 17b                                                         | For binary outcomes, presentation of both absolute and relative effect sizes is recommended                      |
| 18 | Ancillary analyses       | 18                                                          | Results of any other analyses performed, including subgroup analyses and adjusted analyses, distinguishing       |
| 19 |                          |                                                             | pre-specified from exploratory                                                                                   |
| 20 | Harms                    | 19                                                          | All important harms or unintended effects in each group (for specific guidance see CONSORT for harms)            |
| 21 |                          |                                                             | 14/56                                                                                                            |
| 22 | <b>Discussion</b>        |                                                             |                                                                                                                  |
| 23 | Limitations              | 20                                                          | Trial limitations, addressing sources of potential bias, imprecision, and, if relevant, multiplicity of analyses |
| 24 | Generalisability         | 21                                                          | Generalisability (external validity, applicability) of the trial findings                                        |
| 25 | Interpretation           | 22                                                          | Interpretation consistent with results, balancing benefits and harms, and considering other relevant evidence    |
| 26 |                          |                                                             | 17/56                                                                                                            |
| 27 |                          |                                                             | 17/56                                                                                                            |
| 28 |                          |                                                             | 15/56                                                                                                            |
| 29 | <b>Other information</b> |                                                             |                                                                                                                  |
| 30 | Registration             | 23                                                          | Registration number and name of trial registry                                                                   |
| 31 |                          |                                                             | 7/56                                                                                                             |
| 32 | Protocol                 | 24                                                          | Where the full trial protocol can be accessed, if available                                                      |
| 33 |                          |                                                             | On request                                                                                                       |
| 34 | Funding                  | 25                                                          | Sources of funding and other support (such as supply of drugs), role of funders                                  |
| 35 |                          |                                                             | 20/56                                                                                                            |

\*We strongly recommend reading this statement in conjunction with the CONSORT 2010 Explanation and Elaboration for important clarifications on all the items. If relevant, we also recommend reading CONSORT extensions for cluster randomised trials, non-inferiority and equivalence trials, non-pharmacological treatments, herbal interventions, and pragmatic trials. Additional extensions are forthcoming: for those and for up to date references relevant to this checklist, see [www.consort-statement.org](http://www.consort-statement.org).

# BMJ Open

## Influence of videolaryngoscopy using McGrath Mac™ on the need for a helper to perform intubation during general anaesthesia: A multicentre randomised Video - No-Video trial

|                                 |                                                                                                                                                                                                                                                                                                                                                                                                                                                                                                                                                                                                                                                                                                                                                                                                                                                                                                             |
|---------------------------------|-------------------------------------------------------------------------------------------------------------------------------------------------------------------------------------------------------------------------------------------------------------------------------------------------------------------------------------------------------------------------------------------------------------------------------------------------------------------------------------------------------------------------------------------------------------------------------------------------------------------------------------------------------------------------------------------------------------------------------------------------------------------------------------------------------------------------------------------------------------------------------------------------------------|
| Journal:                        | <i>BMJ Open</i>                                                                                                                                                                                                                                                                                                                                                                                                                                                                                                                                                                                                                                                                                                                                                                                                                                                                                             |
| Manuscript ID                   | bmjopen-2021-049275.R2                                                                                                                                                                                                                                                                                                                                                                                                                                                                                                                                                                                                                                                                                                                                                                                                                                                                                      |
| Article Type:                   | Original research                                                                                                                                                                                                                                                                                                                                                                                                                                                                                                                                                                                                                                                                                                                                                                                                                                                                                           |
| Date Submitted by the Author:   | 01-Nov-2021                                                                                                                                                                                                                                                                                                                                                                                                                                                                                                                                                                                                                                                                                                                                                                                                                                                                                                 |
| Complete List of Authors:       | <p>Belze, Olivier; Groupe Clinique Ambroise Paré, Department of Anesthesiology<br/> Coppere, Zoé; Fondation Ophtalmologique Adolphe de Rothschild, Department of Anaesthesiology<br/> Ouattara, Jonathan; Paris Saint Joseph Hospital Group, Department of Anaesthesia<br/> Thion, Laurie-Anne ; Fondation Ophtalmologique Adolphe de Rothschild, Department of Anaesthesia and Intensive Care<br/> Paqueron, Xavier; Centre Clinical de Soyaux, Department of Anaesthesiology and Intensive Care<br/> Devys, Jean-Michel; Service d'Anesthésie-Réanimation, Fondation Ophtalmologique Adolphe de Rothschild 25, rue Manin, F-75019 Paris, France<br/> Ma, Sabrina; Hopital Foch, Department of Anesthesiology<br/> Kennel, Titouan; Hopital Foch, Department of Research and Innovation<br/> Fischler, Marc; Hopital Foch, Anesthesia<br/> Le Guen, Morgan; Hopital Foch, Department of Anesthesiology</p> |
| <b>Primary Subject Heading</b>: | Anaesthesia                                                                                                                                                                                                                                                                                                                                                                                                                                                                                                                                                                                                                                                                                                                                                                                                                                                                                                 |
| Secondary Subject Heading:      | Surgery                                                                                                                                                                                                                                                                                                                                                                                                                                                                                                                                                                                                                                                                                                                                                                                                                                                                                                     |
| Keywords:                       | Adult anaesthesia < ANAESTHETICS, Adult intensive & critical care < ANAESTHETICS, Adult surgery < SURGERY                                                                                                                                                                                                                                                                                                                                                                                                                                                                                                                                                                                                                                                                                                                                                                                                   |
|                                 |                                                                                                                                                                                                                                                                                                                                                                                                                                                                                                                                                                                                                                                                                                                                                                                                                                                                                                             |

SCHOLARONE™  
Manuscripts



I, the Submitting Author has the right to grant and does grant on behalf of all authors of the Work (as defined in the below author licence), an exclusive licence and/or a non-exclusive licence for contributions from authors who are: i) UK Crown employees; ii) where BMJ has agreed a CC-BY licence shall apply, and/or iii) in accordance with the terms applicable for US Federal Government officers or employees acting as part of their official duties; on a worldwide, perpetual, irrevocable, royalty-free basis to BMJ Publishing Group Ltd ("BMJ") its licensees and where the relevant Journal is co-owned by BMJ to the co-owners of the Journal, to publish the Work in this journal and any other BMJ products and to exploit all rights, as set out in our [licence](#).

The Submitting Author accepts and understands that any supply made under these terms is made by BMJ to the Submitting Author unless you are acting as an employee on behalf of your employer or a postgraduate student of an affiliated institution which is paying any applicable article publishing charge ("APC") for Open Access articles. Where the Submitting Author wishes to make the Work available on an Open Access basis (and intends to pay the relevant APC), the terms of reuse of such Open Access shall be governed by a Creative Commons licence – details of these licences and which [Creative Commons](#) licence will apply to this Work are set out in our licence referred to above.

Other than as permitted in any relevant BMJ Author's Self Archiving Policies, I confirm this Work has not been accepted for publication elsewhere, is not being considered for publication elsewhere and does not duplicate material already published. I confirm all authors consent to publication of this Work and authorise the granting of this licence.

1  
2  
3 **Influence of videolaryngoscopy using McGrath Mac™ on the need for a helper to perform**  
4  
5 **intubation during general anaesthesia:**  
6  
7

8 **A multicentre randomised Video - No-Video trial**  
9

10 Running Title: Randomised Videolaryngoscopy trial for patients with normal airways  
11  
12  
13

14  
15 Olivier Belze<sup>1</sup>, Zoe Coppere<sup>2</sup>, Jonathan Ouattara<sup>3</sup>, Laurie-Anne Thion<sup>2</sup>, Xavier Paqueron<sup>4</sup>,

16  
17 Jean-Michel Devys<sup>2</sup>, Sabrina Ma<sup>1</sup>, Titouan Kennel<sup>5</sup>, Marc Fischler<sup>1</sup>,

18  
19 and Morgan Le Guen<sup>1</sup>  
20  
21  
22  
23

24 <sup>1</sup> Hôpital Foch, Department of Anaesthesia, Suresnes, France and Centre Médico-Chirurgical Ambroise

25 Paré, Department of Anaesthesia, Neusthilly-sur-Seine, France

26  
27  
28 <sup>2</sup> Fondation Adolphe de Rothschild, Department of Anaesthesia and Intensive Care, Paris, France

29  
30  
31 <sup>3</sup> Hôpital Saint-Joseph, Department of Anaesthesia, Paris, France

32  
33 <sup>4</sup> Centre Clinical, Department of Anaesthesia and Intensive Care, Soyaux, France

34  
35 <sup>5</sup> Hôpital Foch, Department of Research and Innovation, Suresnes, France  
36

37 Corresponding author: Marc Fischler, MD, Department of Anaesthesia, Hospital Foch, 40 rue Worth,

38  
39 Suresnes, France. Email: m.fischler@orange.fr; Phone: +33 1 46 25 24 42 (Business telephone) - +33 6

40  
41  
42 09 68 78 54 (Mobile); Fax: +33 1 46 25 20 88  
43  
44  
45  
46  
47  
48  
49  
50  
51  
52  
53  
54  
55  
56  
57  
58  
59  
60

## Abstract

**Objective:** We hypothesised that videolaryngoscopy modifies practice of tracheal intubation.

**Design:** Randomised single-blinded study (Video and No-Video groups).

**Setting:** Three institutions: One academic, one non-profit and one profit.

**Participants:** Patients >18 years, requiring orotracheal intubation, without predicted difficult intubation. Non-inclusion criterion was patients requiring a rapid-sequence intubation. 300 patients were included, 271 randomised, 256 analysed: 123 in the No-Video and 133 in the Video groups.

**Intervention:** Tracheal intubation using a McGrath Mac™ videolaryngoscope, the sequence being video recorded.

**Primary and secondary outcome measures:** The primary outcome was the proportion of intubations where assistance is necessary upon request of the operator. Secondary outcomes included intraoperative variables (intubation difficulty scale and its components, percentage of glottic opening score, oesophageal Intubation, duration of intubation, removal of the screen cover in the No-Video group, global evaluation of the ease of intubation, bispectral index, heart rate and blood pressure), intraoperative and postoperative complications (hoarseness or sore throat), and cooperation of the anaesthesiology team.

**Results:** Requirement for assistance was not decreased in the Video group: 36.1% [95% CI 27.9-44.9] versus 45.5% [95%CI 36.5-54.7] in the No-Video group,  $p=0.74$ ; Odds Ratio: 0.7 [0.4-1.1] and Absolute Risk: 0.10 [-0.03-0.22]. Intubation difficulty scale was similar in both groups ( $p=0.05$ ). Percentage of glottic opening score was better in the Video group (median of 100 [95% CI [100-100] and 80 [95%CI [80-90] in the no-Video group;  $p<0.001$ ) as Cormack and Lehane grade ( $p=0001$ ). Ease of intubation was considered better in the Video group ( $p<0.001$ ). Other secondary outcomes were similar between groups. Screen cover was removed in 7.3% (95%CI [2.7-11.9]) of the cases in the Video group. No serious adverse event occurred. Communication and behaviour within the anaesthesia team were appropriate in all cases.

1  
2  
3 **Conclusion:** In patients without predicted difficult intubation, videolaryngoscopy did not decrease the  
4  
5 requirement for assistance to perform intubation.  
6

7 **Trial registration:** Clinicaltrials.gov identifier: NCT02926144  
8  
9  
10  
11  
12  
13  
14  
15  
16  
17  
18  
19  
20  
21  
22  
23  
24  
25  
26  
27  
28  
29  
30  
31  
32  
33  
34  
35  
36  
37  
38  
39  
40  
41  
42  
43  
44  
45  
46  
47  
48  
49  
50  
51  
52  
53  
54  
55  
56  
57  
58  
59  
60

For peer review only

### Strengths and limitations of this study

- This study aimed to assess if the use of a videolaryngoscope modifies the practice of tracheal intubation in real life conditions.
- A major strength of this study performed on patients without a predicted difficult intubation was the choice of the main outcome: the need for help for the anaesthesiologist or the nurse anaesthetist in performing tracheal intubation.
- Permanent presence of a two-person team may have induced a bias because it facilitates the practice of an alternative technique.
- Another weakness comes from the choice of the McGrath MAC videolaryngoscope and, consequently, results cannot be generalized to other videolaryngoscopes which differ by the shape of the blade, and the existence or not of a channel.



## Introduction

Airway management remains a major concern for anaesthesiologists while related morbimortality is determinant for anaesthesia.<sup>1-3</sup> Securing the patient's airway is a critical step in providing general anaesthesia and several recommendations have been published regarding the practice of intubation in anaesthesia.<sup>4, 5</sup> Direct laryngoscopy using the original Macintosh laryngoscope has been the rule for the past half century; however a wide range of videolaryngoscopes has been developed in recent years to provide an indirect visualisation of the glottis via a camera. In patients with a suspected difficult airway, there is no doubt that videolaryngoscopy is associated with a significantly better view of the glottis, increases the first-attempt success and reduces mucosal trauma.<sup>6</sup>

In patients with no predicted difficult airway, no difference in failed intubation has been reported when comparing a videolaryngoscope and Macintosh laryngoscope.<sup>7</sup> Nevertheless some authors consider that the use of videolaryngoscopes must be generalised for all patients, even for those in whom preoperative assessment has not found evidence of a particular risk of access to the airways.<sup>8-10</sup>

In their analysis of the literature, Lewis *et al.*<sup>7</sup> emphasize the importance of the choice of the evaluation criteria used to compare the techniques: glottic view, time required for intubation, successful intubation particularly at the first-attempt, risks of complications like hypoxia or other respiratory complications, laryngeal or airway traumas, and sore throat in the post-anaesthesia care unit. Another question that needs to be asked when a new technology is proposed is: does this technology change the practice?

This randomised multicentre study done in our real-life conditions, presence of an anaesthesiologist and of a nurse anaesthetist during the induction-intubation period, compared two scenarios, both using the same videolaryngoscope, one using the video function and the other not, for orotracheal intubation of surgical patients without particular risk of access to the airways. The hypothesis was that the use of the videolaryngoscope modifies the practice of tracheal intubation, the main outcome being the need for help for the anaesthesiologist or the nurse anaesthetist in performing tracheal intubation.

## Methods

### *Ethics approval*

After approval by the Ethics Committee (Comité de Protection des Personnes Ile de France VIII, Boulogne Billancourt, France, n°160108, 19 February 2016, Chairman Bertrand MUSSETTA) and by the French Regulatory Office, and after registration on the web site ClinicalTrials.gov (NCT02926144, first Posted on October 6, 2016), patients were enrolled in the study after they gave their written informed consent including videorecording and blurring of patients faces if necessary. The complete protocol, registered with the competent authorities under the N° ID-RCP 2013-A01307-38, can be obtained on request.

### *Patient and public involvement*

Patients and public are not involved in any of the phases of this study.

### *Study Design, and Setting*

The McGrath Mac Videolaryngoscope versus McGrath Mac No-Video Laryngoscope for Orotracheal Intubation in Operating Room (Video - No-Video study) trial was an institutionally sponsored, single-blinded, multicentre, two parallel-groups randomised clinical trial (RCT) conducted at three Health Institutions in France (one academic, one non-profit and one profit).

### *Patient population*

Inclusion criteria were patients aged 18 years minimum, requiring general anaesthesia and oro-tracheal intubation with a single lumen tube, without a predicted difficult intubation (Arne score <11).<sup>11</sup> Non-inclusion criteria were currently pregnant or breastfeeding woman, out-patients who could not be contacted within 24 hours following surgery, patients requiring a rapid-sequence intubation, and

1  
2  
3 patients for whom general anaesthesia using sufentanil, propofol, atracurium or rocuronium was not  
4  
5 suitable.

6  
7 Inclusion and exclusion criteria were assessed by an investigator who could be different from the one  
8  
9 who was to perform the intubation. Once in the operating room, inclusion criteria were confirmed by  
10  
11 the anaesthesiologist in charge and randomisation was managed online.  
12  
13  
14  
15

### 16 *Randomisation, Allocation Concealment*

17  
18 Centralized randomisation using fixed-size blocks had been performed by an independent  
19  
20 biostatistician not involved in the trial. The randomisation scheme was balanced 1:1 and stratified by  
21  
22 centre. Each patient received a unique patient number and a randomisation number (patient code)  
23  
24 when the investigator connected to an Interactive Web Response System managed by an independent  
25  
26 Contract Research Organization (Epiconcept Company, 75012, Paris, France) using a protected  
27  
28 password just before the induction of anaesthesia. Thus, patients were randomised into two groups:  
29  
30 a Video group, in which intubation is performed using a McGrath Mac videolaryngoscope with its  
31  
32 screen activated, and a No-Video group, in which intubation is performed using a McGrath Mac  
33  
34 videolaryngoscope with its screen hidden. The software used to allocate the patients to their group  
35  
36 also was in-live fulfilled to collect data by the investigator in an electronic report form, ensuring  
37  
38 concealment.  
39  
40  
41  
42  
43  
44

### 45 *Study Protocol*

46  
47 Patients received care during the induction and intubation periods from an anaesthesiologist and a  
48  
49 nurse anaesthetist as is usual in the hospitals where the protocol took place. All anaesthesiologists and  
50  
51 nurse anaesthetists had performed at least ten intubations with the McGrath Mac Videolaryngoscope.  
52  
53 This experience seems sufficient since the learning curve is steep especially among this population<sup>12</sup>  
54  
55 especially since the professionals received specific training pertaining to the study procedures prior to  
56  
57  
58  
59  
60

1  
2  
3 the beginning of the trial including the fact that they must rely on the video screen in the Video group  
4  
5 and use the direct view in the No-Video group.  
6

7 Upon arrival in the operating room, a dedicated peripheral intravenous cannula for the administration  
8  
9 of IV anaesthetics was placed on the forearm, and routine monitoring was performed including  
10  
11 bispectral index monitoring and quantitative measurement of neuromuscular block at the adductor  
12  
13 pollicis. Patients were positioned in dorsal decubitus with the head on a 7cm high pillow.  
14  
15 Preoxygenation was achieved using a face mask, and oxygen at a flow of 15 L/min or greater for at  
16  
17 least 3 minutes to achieve an end-tidal oxygen fraction of at least 90%.  
18  
19

20  
21 General anaesthesia was then induced by injecting sufentanil, propofol and a neuromuscular blocking  
22  
23 agent (atracurium or rocuronium) once the patient was unconscious. Intubation was performed  
24  
25 by the anaesthesiologist or the nurse anaesthetist using the device allocated at random when  
26  
27 bispectral index was under 60 and when there was no more muscle response to the train of four  
28  
29 stimulation.  
30

31  
32 Intubation was performed using the video screen of the device in the McGrath Mac Videolaryngoscope  
33  
34 group (Video group) while the video screen was hidden with an opaque cover in the McGrath Mac No-  
35  
36 Video Laryngoscope group (No-Video group). Endotracheal tube size was 7 for women and 7.5 for men  
37  
38 with blades size 3 or 4 according the practitioner's preference.  
39

40  
41 Asking for help from the other member of the anaesthetic team was at the discretion of the individual  
42  
43 performing intubation if he/she deemed it necessary to perform an easy and atraumatic intubation.  
44

45 Complementary techniques consisted in (a) backward, upward and rightward pressure (BURP)  
46  
47 manoeuvre; (b) rail-roading the tube over a gum elastic bougie; (c) removing the opaque cover on the  
48  
49 video screen in the No-Video group or change in the operator. If all these techniques failed, other  
50  
51 manoeuvres could be used: (a) insertion of a stylet into the tube; (b) changing the blade; (c) removal  
52  
53 of the pillow. Rescue techniques (insertion of an Intubating Laryngeal Mask Airway, transtracheal  
54  
55 oxygenation, fiberoptic intubation, awakening) were considered if necessary according to the national  
56  
57  
58  
59  
60

1  
2  
3 recommendations.<sup>13</sup> Number of intubation attempts, time to intubate or number of alternative  
4 techniques were not limited by the protocol.  
5

6  
7 After intubation, the cuff was inflated, the tube was connected to the ventilator, and intratracheal  
8 tube position was confirmed by analysing the capnography curve.  
9

10  
11 Anaesthesia was conducted according to good practices.  
12

13  
14 Patients were reviewed the following day. Sore throat and hoarseness were evaluated, and adverse  
15 events collected by investigators not knowing the group to which the patient has been assigned.  
16  
17

### 18 19 20 21 *Data collection*

22  
23 All cases were video recorded by a person not involved in the study which followed a mandatory script.  
24 This person, placed at the feet of the patient, was unable to see whether the screen of the  
25 videolaryngoscope was activated. Video recording began with preoxygenation and ended with the  
26 capnographic confirmation of successful tracheal intubation.  
27  
28

29  
30 The framing of the videos was done in such a way that the patient's anonymity was respected.  
31  
32 Otherwise, the patient's face was blurred before analysis.  
33

34  
35 Analysis of each video was performed by two anaesthesiologists blinded to the study group since the  
36 screen, transparent or opaque, of the videolaryngoscope was not apparent. The videos were reviewed  
37  
38 by both anaesthesiologists in case of discordance.  
39

40  
41 All the variables used for the study were retrieved from the video apart from the glottis exposure which  
42 was recorded in real time by the person who performed the intubation using the Cormack and Lehane  
43 modified score and the percentage of glottis opening scale (POGO) score.<sup>14,15</sup>  
44  
45

46  
47 Timeline of measurement of each variable is summarised in a Supplementary Table.  
48  
49

### 50 51 52 53 54 *Primary and secondary outcomes*

55  
56 The primary outcome, the proportion of orotracheal intubations where assistance was necessary  
57 upon request of the operator, was obtained from the video of the intubation sequence.  
58  
59  
60

1  
2  
3 Secondary outcomes included during the intubation period (1) the intubation difficulty scale,<sup>16</sup> (2) the  
4 Cormack and Lehane grade of glottis visibility,<sup>14</sup> (3) the percentage of glottic opening scale score (POGO)  
5 score,<sup>15</sup> (4) the proportion of patients intubated using alternative techniques: (backward, upward and  
6 rightward pressure (BURP), rail-roading the tube over a gum elastic bougie, insertion of a stylet in the  
7 tube, laryngeal mask airway, fiberoptic endoscopy, or rescue percutaneous or surgical transtracheal  
8 oxygenation ...), anaesthesia discontinuation, (5) the time from introduction of the McGrath  
9 videolaryngoscope in the mouth to the confirmation of tracheal tube position based on partial pressure  
10 of end-tidal exhaled carbon dioxide (third capnogram), (6) the proportion of patients having had an  
11 oesophageal intubation, (7), the ease of intubation evaluated by the anaesthesiologist using a 11-level  
12 numeric scale from 0 (very easy) to 10 (very difficult), (8) the requirement of an abnormal traction  
13 force to intubate, (9) the heart rate and mean arterial pressure measured just before and after  
14 intubation, (10) complications such as oxygen desaturation (peripheral oxygen saturation < 92%) or  
15 hypotension having required treatment. The cooperation between members of the anaesthesiology  
16 team during intubation was graded using a 4-point scale (0=no cooperation at all, 3=a great deal of  
17 cooperation).<sup>17</sup>

18  
19 The postoperative secondary outcomes included the proportion of patient suffering from hoarseness<sup>18</sup>  
20 or sore throat<sup>19</sup> on postoperative day 1. Other adverse events will be also collected.  
21  
22

### 23 *Sample Size calculation*

24  
25 The number of patients to be included took into consideration the frequency with which external  
26 laryngeal pressure is used. Adnet et al. published in 2001 a survey of tracheal intubation difficulty  
27 among 1171 surgical patients and found that the Intubation Difficulty Scale was > 0 in 522 cases  
28 (45%) and that external laryngeal pressure, requiring an assistant to help, was used in 271 of these  
29 cases (23% of all patients).<sup>20</sup> Based on this data, the expected rate for the assistance of another  
30 person for intubation was 25 % for patients in the No-Video group. Presuming that the video function  
31 would decrease this proportion to 12.5 %, with type 1 error set at 5 % and power set at 80 %, 131  
32  
33  
34  
35  
36  
37  
38  
39  
40  
41  
42  
43  
44  
45  
46  
47  
48  
49  
50  
51  
52  
53  
54  
55  
56  
57  
58  
59  
60

1  
2  
3 patients were needed in each group (i.e., 262 patients total). We planned to recruit 300 patients to  
4  
5 mitigate an attrition of the sample or the absence of values.  
6  
7  
8  
9

### 10 *Statistical Analyses*

11  
12 Statistical analysis was conducted using the principle of the intention-to-treat analysis. Results are  
13  
14 presented as number (proportion) [Confidence Interval 95 of the percentage] for categorical variables  
15  
16 and compared by the Chi-square test when the number of observations was greater than five, and by  
17  
18 the exact Fischer test when one of the numbers was less than five. For continuous variables, results are  
19  
20 presented as median (Interquartile Range) [Confidence Interval 95 of the median] and compared by a  
21  
22 Wilcoxon test, after verification of the normality with a Shapiro-Wilk test. All tests were two-sided. The  
23  
24 types of all variables, categorical or continuous, are summarised in a Supplementary Table.  
25  
26

27  
28 P values of less than 0.05 were considered significant. Bonferroni correction was used to correct p  
29  
30 values of the comparison between groups of the Intubation Difficulty Scale and of its parameters.  
31

32 The statistics were generated using SAS 9.4 software.  
33  
34  
35  
36  
37  
38  
39  
40  
41  
42  
43  
44  
45  
46  
47  
48  
49  
50  
51  
52  
53  
54  
55  
56  
57  
58  
59  
60

## Results

Patients were recruited between the 29<sup>th</sup> November 2016 and the 1<sup>st</sup> April 2019. Of 300 included patients, 271 were randomised and 256 analysed with 123 patients in the No-Video group and 133 in the Video group (**Figure 1**).

Baseline features were well balanced between groups (**Table 1**).

Requirement for assistance was not decreased in the Video group (36.1% [95% CI 27.9-44.9] versus 45.5% [95%CI 36.5-54.7] in the No-Video group,  $p=0.74$  after Bonferroni correction; Odds Ratio: 0.7 [0.4-1.1] and Absolute Risk: 0.10 [-0.03-0.22] (**Table 2**). Requirement for assistance was similar between groups when considering each centre separately ( $p=0.99$ ).

The Intubation Difficulty Scale was similar between groups ( $p=0.05$ ; Table 2); its parameters are presented in Table 3.

Glottis visualization was significantly better in the Video group with a lower Cormack and Lehane score ( $p<0.001$ ), and higher percentage of glottic opening score ( $p<0.001$ ). There was no difference between groups considering other outcomes, in particular for duration of intubation, number of attempts, use of complementary techniques (BURP and railroading), except for ease of intubation, better in the Video group ( $p=0.001$ ), and for requirement of an abnormal traction force, lower in the Video group ( $p=0.007$ ). The opaque cover was withdrawn in 7.3% of the cases in the No-Video group (**Tables 2 and 3**).

Bispectral index increased after intubation only in the Video group ( $p=0.04$ ). Heart rate and mean arterial pressure increased in both groups after intubation with a smaller increase in mean arterial pressure in the Video group ( $p=0.04$ ) (**Table 4**).

Communication and behaviour within the anaesthesia team was appropriate in all cases (values of 3).

Oxygen desaturation, hypotension or hypertension requiring treatment during the intubation period



1  
2  
3 and postoperative complications (hoarseness or sore throat) were observed similarly in both groups  
4

5 **(Table 5).**  
6

7 No serious adverse event occurred.  
8  
9  
10  
11  
12  
13  
14  
15  
16  
17  
18  
19  
20  
21  
22  
23  
24  
25  
26  
27  
28  
29  
30  
31  
32  
33  
34  
35  
36  
37  
38  
39  
40  
41  
42  
43  
44  
45  
46  
47  
48  
49  
50  
51  
52  
53  
54  
55  
56  
57  
58  
59  
60

For peer review only

## Discussion

In this Video-No Video trial performed in surgical patients without particular risk of difficulty in airway management, videolaryngoscopy did not decrease the requirement for assistance to perform intubation.

This result corroborates studies which consider that the use of a videolaryngoscope is of little interest in the management of such patients. Advantages of videolaryngoscopy seem to be secondary, especially better glottic visualization<sup>7</sup> which does not translate directly into a higher success rate on the first attempt.<sup>7,21</sup>

There is no universal rule regarding anaesthetic staffing neither for qualifications, anaesthesiologists, or registered nurse anaesthetists nor for the required number during the whole procedure or during the induction-intubation sequence. In our study, patients received care during the induction and intubation periods from an anaesthesiologist and a nurse anaesthetist as is usual in the hospitals where the protocol takes place. This probably explains the high percentage of recourse to a second person since he or she is available without delay. Such incidence is not reported per se in studies contrary to the use of alternative techniques. Except for cases where tracheal intubation is easy, help is needed to perform a BURP manoeuvre or give a gum elastic bougie or a stylet for example.

Interestingly, Jones *et al.* studied the impact of the use the C-MAC videolaryngoscope (Karl Storz Endoscopy, Slough, Berkshire, UK) on nurse anaesthetist working practices and training which has not previously been reported.<sup>22</sup> Most respondents claimed that the videolaryngoscope improved team work with the anaesthesiologist and allow anticipation of the required alternative technique by observing the view at laryngoscopy on a screen. Laryngoscopy is thus moving from an individual process to a shared procedure. Therefore, it is better to use a screen separate from the videolaryngoscope. The participation of the nurse facilitated by the glottic visualization is particularly

1  
2  
3 valuable when he or she performs a BURP to quickly find the most efficient gesture avoiding also a  
4  
5 worsening of the glottic visualization.<sup>23</sup>  
6  
7  
8  
9

10 Alternative techniques were used at a similar incidence in both groups, mainly the backward, upward,  
11 and rightward pressure (BURP) in around 40% of the patients and the use of a gum elastic bougie  
12 (railroading technique) in around 10% of the patients. Such incidence of use of BURP is not surprising  
13 in that incidences of 23%<sup>20</sup> and 36%<sup>24</sup> have been reported previously. High incidence of their use is  
14 probably explained by the fear of dental breakage, with an incidence up to 0.2% of all general  
15 anaesthesia procedures, is responsible for 40% of the complaints against anaesthesiologists in  
16 France.<sup>25</sup>  
17  
18  
19  
20  
21  
22  
23  
24

25 The BURP manoeuvre improves laryngoscopic visualization more easily than simple back pressure on the  
26 larynx<sup>26</sup> and limits the forces exerted during laryngoscopy.<sup>27,28</sup> However, the best condition is represented  
27 when the assistant can view the laryngeal view in real time on a remote screen during intubation to adapt  
28 the BURP to have the best glottic view.<sup>29</sup> The McGrath MAC videolaryngoscope has not this possibility  
29 contrary to other videolaryngoscopes which have the possibility to have a remote screen and thus be  
30 accessible to all participants (Airtraq®, Glidescope®, and King Vision® for example). This is important because  
31 poor BURP practice is counterproductive and aggravates glottic vision.<sup>30</sup> The secondly alternative technique  
32 used is tube rail-roading over a gum elastic bougie.<sup>31</sup> This technique of choice when BURP does not align  
33 the oral, pharyngeal and laryngeal axes is more complex since it requires good coordination between the  
34 members of the team.  
35  
36  
37  
38  
39  
40  
41  
42  
43  
44  
45  
46

47 It should also be noted that the anaesthesiologist chose to remove the screen cover to benefit from  
48 the video function of the videolaryngoscope in 7% of the cases.  
49  
50

51 Finally, complications noticed during the induction-intubation sequence and after it up to the next day  
52 were similar in both groups. Contrary to others who used a Glide Scope, we did not find that the use  
53 of a videolaryngoscope decreased the incidence and severity of sore throat and hoarseness after  
54 tracheal intubation.<sup>32</sup>  
55  
56  
57  
58  
59  
60

1  
2  
3 The strengths of the study come from the usual practice of the centres which were used, including  
4 especially the staffing ratio with one anaesthesiologist and one nurse anaesthetist (1 to 1) in each case.  
5  
6  
7 But this permanent presence of a two-person team may have induced a bias because it facilitates the  
8  
9  
10 practice of an alternative technique. Another strength is the use of the same laryngoscope in both groups,  
11  
12 the only difference being the use or not of the video screen. The last strength is that the present study is  
13  
14 the first single blinded study since most of the criteria of judgment, in particular the main criterion, are  
15  
16 obtained from a video recording of the intubation sequence without the possibility for the evaluator to  
17  
18 know if the video function of the McGrath MAC videolaryngoscope was used.  
19

20  
21 One weakness comes from the choice of the McGrath MAC videolaryngoscope. We chose this device  
22  
23 since it requires limited training because of its similarity to the Macintosh laryngoscope with especially  
24  
25 a similar blade, a small size, and a low cost. Consequently, our results could be valid for other  
26  
27 videolaryngoscopes having a blade-shape like the Macintosh laryngoscope (C-MAC or APA for  
28  
29 example), but not acutely angled videolaryngoscopes (McGrath and GlideScope for example) or with  
30  
31 an integrated channel videolaryngoscope (KingVision, AWS-S200, and Airtraq). Another point  
32  
33 explaining why generalization is not possible is that our procedure includes the simultaneous presence  
34  
35 of an anaesthesiologist, and a nurse anaesthetist as is the rule in the health care institutions that  
36  
37 participated in the study, but this practice is far from being the rule. In these institutions,  
38  
39 anaesthesiologists and nurse anaesthetists have an identical practice when intubation concerns  
40  
41 patients with no particular risk of access to the airways. Other weakness are the risk of 7%  
42  
43 misclassification when using the Arné score to predict difficult intubation<sup>11</sup> and the large number of  
44  
45 patients who were not seen the day after the operation, which makes the postoperative data very  
46  
47 questionable. Another major point is that we used the need for assistance from a member of the  
48  
49 anaesthetic team as the primary outcome. This choice is not usual, but it seemed to us more interesting  
50  
51 than the time to successful tracheal intubation or the number of attempts, outcomes that have little  
52  
53 interest in a population without risk of difficult intubation. On the other hand, we felt it was important  
54  
55 to evaluate the possible benefit of a new technology on the ergonomics of the work of  
56  
57  
58  
59  
60

1  
2  
3 anaesthesiologists. However, one of the limitations of our primary outcome is its personal nature and  
4  
5 we could have been more specific in the need for assistance and possibly create a score combining for  
6  
7 example force exerted and POGO. We sought to have this primary outcome assessed blind to the  
8  
9 randomisation arm. As noted, the person recording the video sequence was positioned at the foot of  
10  
11 the patient, making it impossible to see if there was an opaque cover on the videolaryngoscope screen.  
12  
13 It is possible, however, that the persons who was watching the video could see, or thought they could  
14  
15 see, if the video function was being used. Finally, eight patients were missing in the video-group since  
16  
17 the calculation of the number to be included resulted in a minimum number of 131 patients in each  
18  
19 group. However, it is highly unlikely that this would change the results significantly.  
20  
21  
22  
23  
24  
25  
26  
27  
28  
29  
30  
31  
32  
33  
34  
35  
36  
37  
38  
39  
40  
41  
42  
43  
44  
45  
46  
47  
48  
49  
50  
51  
52  
53  
54  
55  
56  
57  
58  
59  
60

## Conclusion

The Difficult Airway Society (DAS) guidelines for unanticipated difficult intubation recommend that all anaesthesiologists are trained to use a videolaryngoscope and that they have immediate access to one<sup>5</sup> and several authors have called for videolaryngoscopes to be used for all intubations.<sup>9</sup> One would have expected that the use of a videolaryngoscope, i.e. the introduction of a new technology, would have changed the practice of intubation. In patients at low risk of intubation difficulty, the expected benefit should have been greater autonomy for the person performing the procedure. Our results do not confirm this hypothesis.

## Data availability statement

[dataset] [33]. Fischler M. Influence of videolaryngoscopy using McGrath Mac™ on the need for a helper to perform intubation during general anaesthesia: A multicentre randomised Video - No-Video trial. Dryad Digital Repository. January 25, 2021.

<https://datadryad.org/stash/dataset/doi:10.5061%2Fdryad.280gb5mp6>. This dataset contains patients characteristics, variables related to intubation, and postoperative variables.

## Acknowledgements relating to this article

Assistance with the study: We would like to thank Polly GOBIN and by American Journal Experts for their linguistic help.

Funding: This research received no specific grant from any funding agency in the public, commercial or not-for-profit sectors

Conflicts of interest: None.

Presentation: None.

## Authors contribution

OB, XP, JMD, MF and MLG have contribute substantially to conception and design of the study.

OB, ZC, JO, LAT, XP, SM, MLG have contribute substantially to acquisition of data.

All authors have participated to the analysis and interpretation of data.

TK performed the statistical analysis.

MF has written the first draft.

MF has taken responsibility for the integrity of the work as a whole, from inception to published article.

All authors have revised it critically for important intellectual content.

All authors approve the final version.

**REFERENCES**

1. Caplan RA, Posner KL, Ward RJ, Cheney FW. Adverse respiratory events in anesthesia: a closed claims analysis. *Anesthesiology* 1990; 72:828-33.
2. Lienhart A, Auroy Y, Pequignot F *et al.* Survey of anesthesia-related mortality in France. *Anesthesiology* 2006; 105:1087-97.
3. Cook TM, Scott S, Mihai R. Litigation related to airway and respiratory complications of anaesthesia: an analysis of claims against the NHS in England 1995-2007. *Anaesthesia* 2010; 65:556-63.
4. Apfelbaum JL, Hagberg CA, Caplan RA *et al.* Practice guidelines for management of the difficult airway: an updated report by the American Society of Anesthesiologists Task Force on Management of the Difficult Airway. *Anesthesiology* 2013; 118:251-70.
5. Frerk C, Mitchell VS, McNarry AF *et al.* Difficult Airway Society 2015 guidelines for management of unanticipated difficult intubation in adults. *Br J Anaesth* 2015; 115:827-48.
6. Pieters BMA, Maas EHA, Knape JTA, van Zundert AAJ. Videolaryngoscopy vs. direct laryngoscopy use by experienced anaesthetists in patients with known difficult airways: a systematic review and meta-analysis. *Anaesthesia* 2017; 72:1532-41.
7. Lewis SR, Butler AR, Parker J, Cook TM, Schofield-Robinson OJ, Smith AF. Videolaryngoscopy versus direct laryngoscopy for adult patients requiring tracheal intubation: a Cochrane Systematic Review. *Br J Anaesth* 2017; 119:369-83.
8. Xue FS, Liu GP, Sun C. Videolaryngoscope as a standard intubation device. *Br J Anaesth* 2015; 115:137-8.
9. Zaouter C, Calderon J, Hemmerling TM. Videolaryngoscopy as a new standard of care. *Br J Anaesth* 2015; 114:181-3.
10. Cook TM, Boniface NJ, Seller C *et al.* Universal videolaryngoscopy: a structured approach to conversion to videolaryngoscopy for all intubations in an anaesthetic and intensive care department. *Br J Anaesth* 2018; 120:173-80.



- 1  
2  
3 11. Arne J, Descoins P, Fusciardi J *et al.* Preoperative assessment for difficult intubation in general and ENT  
4 surgery: predictive value of a clinical multivariate risk index. *Br J Anaesth* 1998; 80:140-6.  
5  
6
- 7 12. Savoldelli GL, Schiffer E, Abegg C, *et al.* Learning curves of the Glidescope, the McGrath and the  
8 Airtraq laryngoscopes: a manikin study. *Eur J Anaesthesiol* 2009;26:554-8.  
9
- 10 13. Langeron O, Bourgain JL, Laccoureye O, Legras A, Orliaguet G. [Difficult airway algorithms and  
11 management]. *Ann Fr Anesth Reanim* 2008; 27:41-5.  
12
- 13 14. Cormack RS. Cormack-Lehane classification revisited. *Br J Anaesth* 2010; 105:867-8.  
14
- 15 15. Levitan RM, Ochroch EA, Kush S, Shofer FS, Hollander JE. Assessment of airway visualization:  
16 validation of the percentage of glottic opening (POGO) scale. *Acad Emerg Med* 1998; 5:919-23.  
17
- 18 16. Adnet F, Borron SW, Racine SX *et al.* The intubation difficulty scale (IDS): proposal and evaluation of a  
19 new score characterizing the complexity of endotracheal intubation. *Anesthesiology* 1997; 87:1290-7.  
20
- 21 17. Kraus MW, Huang C, Keltner D. Tactile communication, cooperation, and performance: an  
22 ethological study of the NBA. *Emotion* 2010; 10:745-9.  
23
- 24 18. Stout DM, Bishop MJ, Dwersteg JF, Cullen BF. Correlation of endotracheal tube size with sore  
25 throat and hoarseness following general anesthesia. *Anesthesiology* 1987; 67:419-21.  
26
- 27 19. Capan LM, Bruce DL, Patel KP, Turndorf H. Succinylcholine-induced postoperative sore throat.  
28 *Anesthesiology* 1983; 59:202-6.  
29
- 30 20. Adnet F, Racine SX, Borron SW *et al.* A survey of tracheal intubation difficulty in the operating  
31 room: a prospective observational study. *Acta Anaesthesiol Scand* 2001; 45:327-2.  
32
- 33 21. Hoshijima H, Mihara T, Maruyama K *et al.* McGrath videolaryngoscope versus Macintosh  
34 laryngoscope for tracheal intubation: A systematic review and meta-analysis with trial sequential  
35 analysis. *J Clin Anesth* 2018; 46:25-32.  
36
- 37 22. Jones L, Mulcahy K, Fox J, Cook TM, Kelly FE. C-MAC((c)) videolaryngoscopy: The anaesthetic  
38 assistant's view. *J Perioper Pract* 2018; 28:83-9.  
39
- 40 23. Cook TM. The cricoid debate - balancing risks and benefits. *Anaesthesia* 2016; 71:721-2.  
41  
42  
43  
44  
45  
46  
47  
48  
49  
50  
51  
52  
53  
54  
55  
56  
57  
58  
59  
60

- 1  
2  
3 24. Akhtar M, Ali Z, Hassan N, Mehdi S, Wani GM, Mir AH. A randomized study comparing the sniffing  
4 position with simple head extension for glottis visualization and difficulty in intubation during direct  
5 laryngoscopy. *Anesthesia, Essays and Researches* 2017; 11:762-6.  
6  
7  
8  
9  
10 25. Nouette-Gaulain K, Lenfant F, Jacquet-Francillon D *et al.* [French clinical guidelines for prevention  
11 of perianaesthetic dental injuries: long text]. *Ann Fr Anesth Reanim* 2012; 31:213-23.  
12  
13  
14 26. Takahata O, Kubota M, Mamiya K *et al.* The efficacy of the "BURP" maneuver during a difficult  
15 laryngoscopy. *Anesth Analg* 1997; 84:419-21.  
16  
17  
18  
19 27. Bishop MJ, Harrington RM, Tencer AF. Force applied during tracheal intubation. *Anesth Analg*  
20 1992; 74:411-4.  
21  
22  
23  
24 28. Bucx MJ, van der Vegt MH, Sniijders CJ, Stijnen T, Wesselink PR. Transverse forces exerted on the  
25 maxillary incisors during laryngoscopy. *Can J Anaesth* 1996; 43:665-71.  
26  
27  
28 29. Loughnan TE, Gunasekera E, Tan TP. Improving the C-MAC video laryngoscopic view when  
29 applying cricoid pressure by allowing access of assistant to the video screen. *Anaesth Intensive Care*  
30 2012; 40:128-30.  
31  
32  
33  
34 30. Snider DD, Clarke D, Finucane BT. The "BURP" maneuver worsens the glottic view when applied  
35 in combination with cricoid pressure. *Can J Anaesth* 2005; 52:100-4.  
36  
37  
38  
39 31. Macintosh RR. An aid to oral intubation. *BMJ* 1949; 1:28.  
40  
41  
42 32. Najafi A, Imani F, Makarem J *et al.* Postoperative sore throat after laryngoscopy with macintosh or  
43 glide scope video laryngoscope blade in normal airway patients. *Anesth Pain Med* 2014; 4:e15136.  
44  
45  
46 [dataset] 33. Fischler M. Influence of videolaryngoscopy using McGrath Mac™ on the need for a helper to  
47 perform intubation during general anaesthesia: A multicentre randomised Video - No-Video trial. Dryad  
48 Digital Repository. January 25, 2021.  
49  
50  
51 <https://datadryad.org/stash/dataset/doi:10.5061%2Fdryad.280gb5mp6>.  
52  
53  
54  
55  
56  
57  
58  
59  
60

1  
2  
3 **Legend of Figure 1**  
4

5 Flow chart  
6

7  
8 No-Video Group: intubation was performed using a McGrath Mac videolaryngoscope with its screen  
9  
10 deactivated

11  
12 Video group: intubation was performed using a McGrath Mac videolaryngoscope with its screen  
13  
14 activated

15  
16 No VR: No video recording  
17  
18  
19  
20  
21  
22

23 **Supplementary Table**  
24

25  
26 Outcomes (type of variable and timeline of measurements)  
27  
28  
29  
30  
31  
32  
33  
34  
35  
36  
37  
38  
39  
40  
41  
42  
43  
44  
45  
46  
47  
48  
49  
50  
51  
52  
53  
54  
55  
56  
57  
58  
59  
60

For peer review only

Table 1. Patient characteristics

|                                                                      | Video group<br>(n=133)      | No-Video group<br>(n=123)   |
|----------------------------------------------------------------------|-----------------------------|-----------------------------|
| Male patients, number (%) [95% CI of %]                              | 61 (45.9)<br>[37.2 - 54.7]  | 58 (47.1)<br>[38.3 - 56.4]  |
| Age, years, median (IQR) [95% CI of median]                          | 58 (23)<br>[54 - 62]        | 60 (26)<br>[52 - 64]        |
| Body mass index, kg/m <sup>2</sup> , median (IQR) [95% CI of median] | 25.1 (6.3)<br>[24.2 - 26.1] | 24.7 (5.8)<br>[23.7 - 25.4] |
| Arné score <sup>11</sup> , number (%) [95% CI of %]                  | 2 (5)<br>[2 - 3]            | 2 (4)<br>[2 - 2]            |
| Previous knowledge of difficult intubation                           | 1 (0.8)<br>[0.0 - 4.1]      | 1 (0.8)<br>[0.0 - 4.4]      |
| Pathologies associated with difficult intubation                     | 1 (0.8)<br>[0.0 - 4.1]      | 0                           |
| Clinical symptoms of airway pathology                                | 6 (4.5)<br>[1.7 - 9.6]      | 6 (4.9)<br>[1.8 - 10.3]     |
| Interincisor gap (<25 mm) and limited mandible luxation              | 0                           | 0                           |
| Thyromental distance < 65 mm                                         | 4 (3.0)<br>[0.8 - 7.5]      | 2 (1.6)<br>[0.2 - 5.7]      |
| Maximum range of head and neck movement ≤ 80°                        | 4 (3.0)<br>[0.8 - 7.5]      | 1 (0.8)<br>[0.0 - 4.4]      |
| Mallampati score                                                     |                             |                             |
| 1                                                                    | 71 (53.4)<br>[44.5 - 62.1]  | 69 (56.1)<br>[46.9 - 65.0]  |
| 2                                                                    | 51 (38.3)<br>[30.0 - 47.2]  | 42 (34.1)<br>[25.8 - 43.2]  |
| 3                                                                    | 10 (7.5)<br>[3.7 - 13.4]    | 12 (9.7)<br>[5.1 - 16.4]    |
| 4                                                                    | 1 (0.8)<br>[0.0 - 4.1]      | 0                           |

Table 2. Intubation variables (final values)

|                                                                                                               | Video group<br>(n=133)  | No-Video group (n=123)  | P value |
|---------------------------------------------------------------------------------------------------------------|-------------------------|-------------------------|---------|
| Required assistance by the additional person, yes, number (%) [95% CI of %]                                   | 48 (36.1) [27.9 - 44.9] | 56 (45.5) [36.5 --54.7] | 0.74*   |
| Intubation Difficulty Scale (IDS), classes, number (%) [95% CI of %]                                          |                         |                         | 0.05*   |
| IDS = 0                                                                                                       | 77 (57.9) [49.0 - 66.4] | 50 (40.6) [31.9 - 49.9] |         |
| 0 < IDS ≤ 5                                                                                                   | 55 (41.3) [32.9 - 50.2] | 68 (55.3) [46.1 - 64.2] |         |
| > 5                                                                                                           | 1 (0.8) [0.0 - 4.1]     | 5 (4.1) [1.3 - 9.2]     |         |
| Railroading the tube over a gum elastic bougie, yes, number (%) [95% CI of %]                                 | 16 (12.0)[7.0 - 18.8]   | 13 (10.6) [5.7 - 17.4]  | 0.71    |
| Percentage of glottic opening score, median (IQR) [95% CI of median]                                          | 100 (10) [100 - 100]    | 80 (40) [80 - 90]       | <0.001  |
| Oesophageal Intubation, yes, number (%) [95% CI of %]                                                         | 4 (3.1) [0.8 - 7.5]     | 2 (1.6) [0.2 - 5.7]     | 0.68    |
| BURP, yes, number (%) [95% CI of %]                                                                           | 46 (34.6)[26.6 - 43.3]  | 53 (43.1) [34.2 - 52.3] | 0.16    |
| Removing the cover, yes, number (%) [95% CI of %]                                                             |                         | 9 (7.3) [2.7 - 11.9]    |         |
| Time between the introduction of the McGrath and the third capnogram, sec,<br>median (IQR) [95% CI of median] | 50 (31) [46 - 57] {113} | 49 (31) [42 - 53] {104} | 0.13    |
| Ease of intubation, 0 (very easy) - 10 (very difficult), median (IQR) [95% CI of<br>median]                   | 0 (2) [0 - 0]           | 2 (4) [1 - 2]           | <0.001  |

In cases in which the data are incomplete, the number of available data points is indicated between curly brackets {}

\* P value with Bonferroni correction

Table 3. Parameters of the Intubation Difficulty Scale, (final values)

|                                                                             | Video group (n=133)      | No-Video group (n=123)  | P value*     |
|-----------------------------------------------------------------------------|--------------------------|-------------------------|--------------|
| Number of attempts, classes, number (%) [95% CI of %]                       |                          |                         | 0.99         |
| 1                                                                           | 122 (91.7) [87.0 - 96.4] | 112 (91.1)[86.0 - 96.1] |              |
| 2                                                                           | 10 (7.5)[3.0 - 12.0]     | 6 (4.9)[1.1 - 8.7]      |              |
| 3                                                                           | 1 (0.8)[0.0 - 2.2]       | 4 (3.2)[0.1 - 6.4]      |              |
| 4                                                                           | 0 (0.0)[0.0 - 0.0]       | 1 (0.8)[0.0 - 2.4]      |              |
| Required assistance by the additional person, yes, number (%) [95% CI of %] | 48 (36.1) [27.9 - 44.9]  | 56 (45.5) [36.5 - 54.7] | 0.74         |
| Number of alternatives techniques, number (%) [95% CI of %]                 |                          |                         | 0.99         |
| None                                                                        | 85 (63.9) [55.7 - 72.1]  | 69 (56.1) [47.3 - 64.8] |              |
| 1                                                                           | 34 (25.6) [18.1 - 33.0]  | 42 (34.1) [25.8 - 42.6] |              |
| 2                                                                           | 14 (10.5) [5.3 - 15.7]   | 12 (9.8) [4.5 - 15.0]   |              |
| Cormack and Lehane grade, number (%) [95% CI of %]                          |                          |                         | <b>0.001</b> |
| 1                                                                           | 111 (83.5) [76.0 - 89.3] | 63 (51.2) [42.0 - 60.3] |              |
| 2a                                                                          | 19 (14.3) [8.8 - 21.4]   | 33 (26.8) [19.2 - 35.6] |              |
| 2b                                                                          | 1 (0.8) [0.0 - 4.1]      | 18 (14.6) [8.9 - 22.1]  |              |
| 3                                                                           | 2 (1.5) [0.2 - 5.3]      | 9 (7.3) [3.4 - 13.4]    |              |
| Abnormal traction force, yes, number (%) [95% CI of %]                      | 13 (9.8) [5.3 - 16.1]    | 27 (21.9) [15.0 - 30.3] | <b>0.04</b>  |
| Vocal cord position, abduction, yes, number (%) [95% CI of %]               | 133 (100) [100 - 100]    | 123 (100) [100 - 100]   | NA           |

In cases in which the data are incomplete, the number of available data points is indicated between curly brackets {}.

\*: P values were calculated using Bonferroni correction

Table 4. Bispectral index, heart rate and arterial pressure measurements (change from baseline and from preintubation period)

|                                               | Group             | Before induction | Before intubation | After intubation | Difference<br>between before<br>and after<br>intubation | Before<br>intubation<br>vs.<br>after intubation | Video<br>vs.<br>No-Video<br>group<br><br>P-value |
|-----------------------------------------------|-------------------|------------------|-------------------|------------------|---------------------------------------------------------|-------------------------------------------------|--------------------------------------------------|
| BIS, number (%)                               | Video group       | 94 (8)           | 40 (19)           | 44 (18)          | 2 (15)                                                  | 0.11                                            | 0.20                                             |
| [95% CI of %]                                 |                   | [93 – 97] {74}   | [37 – 45] {88}    | [40 – 47] {102}  | (0 – 5) {85}                                            |                                                 |                                                  |
|                                               | No-Video<br>group | 96 (6)           | 46 (21)           | 50 (17)          | 5 (17)                                                  | <b>0.04</b>                                     |                                                  |
|                                               |                   | [94 – 97] {75}   | (42 – 48) {84}    | [46 – 53] {89}   | (2 – 9) {79}                                            |                                                 |                                                  |
| HR, beats/min,<br>number (%) [95%<br>CI of %] | Video group       | 74 (20)          | 67 (16)           | 79 (27)          | 9 (17)                                                  | <b>&lt;0.001</b>                                | 0.103                                            |
|                                               |                   | [71 - 78] {129}  | [63 - 70] {130}   | [75 - 82] {131}  | (7 - 14) {129}                                          |                                                 |                                                  |
|                                               | No-Video<br>group | 72 (22)          | 65 (16)           | 83 (23)          | 13 (19)                                                 | <b>&lt;0.001</b>                                |                                                  |
|                                               |                   | [68 - 76] {115}  | [61 - 69] {121}   | [78 - 86] {121}  | (10 - 19) {120}                                         |                                                 |                                                  |
| MAP, mmHg,<br>number (%) [95%<br>CI of %]     | Video group       | 98 (20)          | 74 (24)           | 82 (28)          | 4 (25)                                                  | <b>0.007</b>                                    | <b>0.04</b>                                      |
|                                               |                   | [93 - 100] {128} | [72 - 81] {125}   | [78 - 87] {125}  | (0 - 7) {121}                                           |                                                 |                                                  |
|                                               | No-Video<br>group | 99 (22)          | 77 (22)           | 87 (41)          | 12 (39)                                                 | <b>&lt;0.001</b>                                |                                                  |
|                                               |                   | [97 - 104] {114} | (74 - 84) {118}   | [82 - 93] {113}  | (5 - 20) {110}                                          |                                                 |                                                  |

The results are presented as median (interquartile range) [95% CI of the median]. Number of available data points is indicated between curly brackets {}.

BIS = Bispectral index, HR = heart rate (beats per minute), PAM = mean blood pressure (mmHg)

Table 5. Intra- and postoperative complications

|                                                                                    | Video group<br>(n=133)     | No-Video group<br>(n=123)  | P value |
|------------------------------------------------------------------------------------|----------------------------|----------------------------|---------|
| <b>Intraoperative complications</b>                                                |                            |                            |         |
| Oxygen desaturation (peripheral oxygen saturation < 92%), number (%) [95% CI of %] | 2 (1.5)<br>[0.2 - 5.3]     | 0                          | 0.50    |
| Hypotension having required treatment, number (%) [95% CI of %]                    | 4 (3.0)<br>[0.1 - 5.9]     | 3 (2.4)<br>[0.0 - 5.2]     | 0.99    |
| Hypertension having required treatment, number (%) [95% CI of %]                   | 0 (0.0)<br>[0.0 - 0.0]     | 1 (0.0)<br>[0.0 - 2.4]     | 0.48    |
| Dental injury, number (%) [95% CI of %]                                            | 0                          | 0                          |         |
| <b>Postoperative complications</b>                                                 |                            |                            |         |
| Hoarseness, number (%) [95% CI of %]                                               | {n=34}                     | {n=37}                     | 0.99    |
| Grade 1                                                                            | 23 (68)<br>[49.5 - 82.6]   | 25 (68)<br>[50.2 - 82.0]   |         |
| Grade 2                                                                            | 11 (32)<br>[17.4 - 50.5]   | 12 (32)<br>[18.0 - 49.8]   |         |
| Grade 3                                                                            | 0                          | 0                          |         |
| Sore throat, number (%) [95% CI of %]                                              | {n=42}                     | {n=33}                     | 0.41    |
| Grade 1                                                                            | 33 (78.6)<br>[63.2 - 89.7] | 23 (69.7)<br>[51.3 - 84.4] |         |
| Grade 2                                                                            | 8 (19.0)<br>[8.6 - 34.1]   | 10 (30.3)<br>[15.6 - 48.7] |         |
| Grade 3                                                                            | 1 (2.4)<br>[0.1 - 12.6]    | 0                          |         |

When the data were incomplete, the number of available data points is indicated between curly brackets {}.





Figure 1

Figure 1

297x209mm (300 x 300 DPI)

Supplementary Table. Outcomes (type of variable and timeline of measurements)

|                                                                               | Type of variable | Timeline of the measurement |
|-------------------------------------------------------------------------------|------------------|-----------------------------|
| Primary outcome                                                               |                  |                             |
| Required assistance by the additional person, yes                             | Categorical      | Off line                    |
| Secondary outcomes                                                            |                  |                             |
| Intubation                                                                    |                  |                             |
| Intubation Difficulty Scale, three classes                                    | Categorical      |                             |
| Number of attempts, four classes                                              | Categorical      | Off line                    |
| Number of operators, one/two                                                  | Categorical      | Off line                    |
| Number of alternative techniques, none/one/two                                | Categorical      | Off line                    |
| Cormack and Lehane grade, four classes                                        | Categorical      | On line                     |
| Abnormal traction force, yes                                                  | Categorical      | On line                     |
| BURP, yes                                                                     | Categorical      | Off line                    |
| Vocal cord position (abduction), yes                                          | Categorical      | On line                     |
| Railroading the tube over a gum elastic bougie, yes                           | Categorical      | Off line                    |
| Percentage of glottic opening score                                           | Continuous       | On line                     |
| Oesophageal Intubation, yes                                                   | Categorical      | On line                     |
| Removing the cover, yes                                                       | Categorical      | Off line                    |
| Time between the introduction of the McGrath and the third capnogram, seconds | Continuous       | Off line                    |
| Ease of intubation, 0 (very easy) to 10 (very difficult),                     | Continuous       | On line                     |
| BIS and haemodynamic variables                                                |                  |                             |
| BIS, absolute values,                                                         | Continuous       | On line                     |
| Heart rate and arterial pressure, absolute values,                            | Continuous       | On line                     |
| Intraoperative complications                                                  |                  |                             |
| Oxygen desaturation (peripheral oxygen saturation < 92%), yes                 | Categorical      | On line                     |
| Hypotension having required treatment, yes                                    | Categorical      | On line                     |
| Hypertension having required treatment, yes                                   | Categorical      | On line                     |
| Dental injury, yes                                                            | Categorical      | On line                     |
| Postoperative complications                                                   |                  |                             |
| Hoarseness, three grades                                                      | Categorical      | Day1                        |
| Sore throat, three grades                                                     | Categorical      | Day1                        |
| Serious adverse event, yes                                                    | Categorical      | Day1                        |

On line: variable recorded during the procedure

Off line: variable recorded a posteriori from the lecture of the video of the intubation sequence

Day1: postoperative visit at day1



## CONSORT 2010 checklist of information to include when reporting a randomised trial\*

| Section/Topic                    | Item No | Checklist item                                                                                                                                                                              | Reported on page No |
|----------------------------------|---------|---------------------------------------------------------------------------------------------------------------------------------------------------------------------------------------------|---------------------|
| <b>Title and abstract</b>        |         |                                                                                                                                                                                             |                     |
|                                  | 1a      | Identification as a randomised trial in the title                                                                                                                                           | 2/56                |
|                                  | 1b      | Structured summary of trial design, methods, results, and conclusions (for specific guidance see CONSORT for abstracts)                                                                     | 3/56                |
| <b>Introduction</b>              |         |                                                                                                                                                                                             |                     |
| Background and objectives        | 2a      | Scientific background and explanation of rationale                                                                                                                                          | 6/56                |
|                                  | 2b      | Specific objectives or hypotheses                                                                                                                                                           | 6/56                |
| <b>Methods</b>                   |         |                                                                                                                                                                                             |                     |
| Trial design                     | 3a      | Description of trial design (such as parallel, factorial) including allocation ratio                                                                                                        | 7/56                |
|                                  | 3b      | Important changes to methods after trial commencement (such as eligibility criteria), with reasons                                                                                          | NA                  |
| Participants                     | 4a      | Eligibility criteria for participants                                                                                                                                                       | 7/56                |
|                                  | 4b      | Settings and locations where the data were collected                                                                                                                                        | 7/56                |
| Interventions                    | 5       | The interventions for each group with sufficient details to allow replication, including how and when they were actually administered                                                       | 8/56                |
| Outcomes                         | 6a      | Completely defined pre-specified primary and secondary outcome measures, including how and when they were assessed                                                                          | 10/56               |
|                                  | 6b      | Any changes to trial outcomes after the trial commenced, with reasons                                                                                                                       | NA                  |
| Sample size                      | 7a      | How sample size was determined                                                                                                                                                              | 11/56               |
|                                  | 7b      | When applicable, explanation of any interim analyses and stopping guidelines                                                                                                                | NA                  |
| <b>Randomisation:</b>            |         |                                                                                                                                                                                             |                     |
| Sequence generation              | 8a      | Method used to generate the random allocation sequence                                                                                                                                      | 8/56                |
|                                  | 8b      | Type of randomisation; details of any restriction (such as blocking and block size)                                                                                                         | 8/56                |
| Allocation concealment mechanism | 9       | Mechanism used to implement the random allocation sequence (such as sequentially numbered containers), describing any steps taken to conceal the sequence until interventions were assigned | 8/56                |
| Implementation                   | 10      | Who generated the random allocation sequence, who enrolled participants, and who assigned participants to interventions                                                                     | 8/56                |
| Blinding                         | 11a     | If done, who was blinded after assignment to interventions (for example, participants, care providers, those                                                                                | 10/56               |

|    |                          |                                                             |                                                                                                                  |
|----|--------------------------|-------------------------------------------------------------|------------------------------------------------------------------------------------------------------------------|
| 1  |                          | assessing outcomes) and how                                 |                                                                                                                  |
| 2  | 11b                      | If relevant, description of the similarity of interventions | NA                                                                                                               |
| 3  | Statistical methods      | 12a                                                         | Statistical methods used to compare groups for primary and secondary outcomes                                    |
| 4  |                          | 12b                                                         | Methods for additional analyses, such as subgroup analyses and adjusted analyses                                 |
| 5  |                          |                                                             | NA                                                                                                               |
| 6  | <b>Results</b>           |                                                             |                                                                                                                  |
| 7  | Participant flow (a      | 13a                                                         | For each group, the numbers of participants who were randomly assigned, received intended treatment, and         |
| 8  | diagram is strongly      |                                                             | were analysed for the primary outcome                                                                            |
| 9  | recommended)             | 13b                                                         | For each group, losses and exclusions after randomisation, together with reasons                                 |
| 10 | Recruitment              | 14a                                                         | Dates defining the periods of recruitment and follow-up                                                          |
| 11 |                          | 14b                                                         | Why the trial ended or was stopped                                                                               |
| 12 | Baseline data            | 15                                                          | A table showing baseline demographic and clinical characteristics for each group                                 |
| 13 | Numbers analysed         | 16                                                          | For each group, number of participants (denominator) included in each analysis and whether the analysis was      |
| 14 |                          |                                                             | by original assigned groups                                                                                      |
| 15 | Outcomes and             | 17a                                                         | For each primary and secondary outcome, results for each group, and the estimated effect size and its            |
| 16 | estimation               |                                                             | precision (such as 95% confidence interval)                                                                      |
| 17 |                          | 17b                                                         | For binary outcomes, presentation of both absolute and relative effect sizes is recommended                      |
| 18 | Ancillary analyses       | 18                                                          | Results of any other analyses performed, including subgroup analyses and adjusted analyses, distinguishing       |
| 19 |                          |                                                             | pre-specified from exploratory                                                                                   |
| 20 | Harms                    | 19                                                          | All important harms or unintended effects in each group (for specific guidance see CONSORT for harms)            |
| 21 |                          |                                                             | 14/56                                                                                                            |
| 22 | <b>Discussion</b>        |                                                             |                                                                                                                  |
| 23 | Limitations              | 20                                                          | Trial limitations, addressing sources of potential bias, imprecision, and, if relevant, multiplicity of analyses |
| 24 | Generalisability         | 21                                                          | Generalisability (external validity, applicability) of the trial findings                                        |
| 25 | Interpretation           | 22                                                          | Interpretation consistent with results, balancing benefits and harms, and considering other relevant evidence    |
| 26 |                          |                                                             | 17/56                                                                                                            |
| 27 |                          |                                                             | 17/56                                                                                                            |
| 28 |                          |                                                             | 15/56                                                                                                            |
| 29 | <b>Other information</b> |                                                             |                                                                                                                  |
| 30 | Registration             | 23                                                          | Registration number and name of trial registry                                                                   |
| 31 |                          |                                                             | 7/56                                                                                                             |
| 32 | Protocol                 | 24                                                          | Where the full trial protocol can be accessed, if available                                                      |
| 33 |                          |                                                             | On request                                                                                                       |
| 34 | Funding                  | 25                                                          | Sources of funding and other support (such as supply of drugs), role of funders                                  |
| 35 |                          |                                                             | 20/56                                                                                                            |

\*We strongly recommend reading this statement in conjunction with the CONSORT 2010 Explanation and Elaboration for important clarifications on all the items. If relevant, we also recommend reading CONSORT extensions for cluster randomised trials, non-inferiority and equivalence trials, non-pharmacological treatments, herbal interventions, and pragmatic trials. Additional extensions are forthcoming: for those and for up to date references relevant to this checklist, see [www.consort-statement.org](http://www.consort-statement.org).
