# Supplementary material for: Influence of videolaryngoscopy using McGrath Mac on the need for a helper to perform intubation during general anaesthesia: a multicentre randomised video-no-video trial
Source: PubMed Central journal article supplement — BMJ Open. 2022 Jan 3;12(1):e049275. doi: 10.1136/bmjopen-2021-049275 (PMC8724720; doi:10.1136/bmjopen-2021-049275), 2022-01-03
Supplement: bmjopen-2021-049275supp001.pdf [file bmjopen-2021-049275supp001.pdf]

Supplementary Table. Outcomes (type of variable and timeline of measurements)

|                                                                               | Type of variable | Timeline of the measurement |
|-------------------------------------------------------------------------------|------------------|-----------------------------|
| Primary outcome                                                               |                  |                             |
| Required assistance by the additional person, yes                             | Categorical      | Off line                    |
| Secondary outcomes                                                            |                  |                             |
| Intubation                                                                    |                  |                             |
| Intubation Difficulty Scale, three classes                                    | Categorical      |                             |
| Number of attempts, four classes                                              | Categorical      | Off line                    |
| Number of operators, one/two                                                  | Categorical      | Off line                    |
| Number of alternative techniques, none/one/two                                | Categorical      | Off line                    |
| Cormack and Lehane grade, four classes                                        | Categorical      | On line                     |
| Abnormal traction force, yes                                                  | Categorical      | On line                     |
| BURP, yes                                                                     | Categorical      | Off line                    |
| Vocal cord position (abduction), yes                                          | Categorical      | On line                     |
| Railroading the tube over a gum elastic bougie, yes                           | Categorical      | Off line                    |
| Percentage of glottic opening score                                           | Continuous       | On line                     |
| Oesophageal Intubation, yes                                                   | Categorical      | On line                     |
| Removing the cover, yes                                                       | Categorical      | Off line                    |
| Time between the introduction of the McGrath and the third capnogram, seconds | Continuous       | Off line                    |
| Ease of intubation, 0 (very easy) to 10 (very difficult),                     | Continuous       | On line                     |
| BIS and haemodynamic variables                                                |                  |                             |
| BIS, absolute values,                                                         | Continuous       | On line                     |
| Heart rate and arterial pressure, absolute values,                            | Continuous       | On line                     |
| Intraoperative complications                                                  |                  |                             |
| Oxygen desaturation (peripheral oxygen saturation < 92%), yes                 | Categorical      | On line                     |
| Hypotension having required treatment, yes                                    | Categorical      | On line                     |
| Hypertension having required treatment, yes                                   | Categorical      | On line                     |
| Dental injury, yes                                                            | Categorical      | On line                     |
| Postoperative complications                                                   |                  |                             |
| Hoarseness, three grades                                                      | Categorical      | Day1                        |
| Sore throat, three grades                                                     | Categorical      | Day1                        |
| Serious adverse event, yes                                                    | Categorical      | Day1                        |

On line: variable recorded during the procedure

Off line: variable recorded a posteriori from the lecture of the video of the intubation sequence

Day1: postoperative visit at day1
